# Supplementary material for: Theoretical exploration of single-molecule magnetic and single-molecule toroic behaviors in peroxide-bridged double-triangular {MII3LnIII3} (M = Ni, Cu and Zn; Ln = Gd, Tb and Dy) complexes
Source: Royal Society of Chemistry journal article supplement (doi:10.1039/d4dt01800a), 2024-01-01
Supplement: d4dt01800a1.pdf [file d4dt01800a1.pdf]

# Electronic Supporting Information

## Theoretical Exploration of Single-Molecule Magnetic and Single-Molecule Toric Behavior in Peroxide-Bridged Double-triangular $\{M^{II}_3Ln^{III}_3\}$ (M = Ni, Cu and Zn; Ln = Gd, Tb and Dy) Complexes

Amit Gharu<sup>a</sup> and Kuduva R. Vignesh<sup>a,\*</sup>

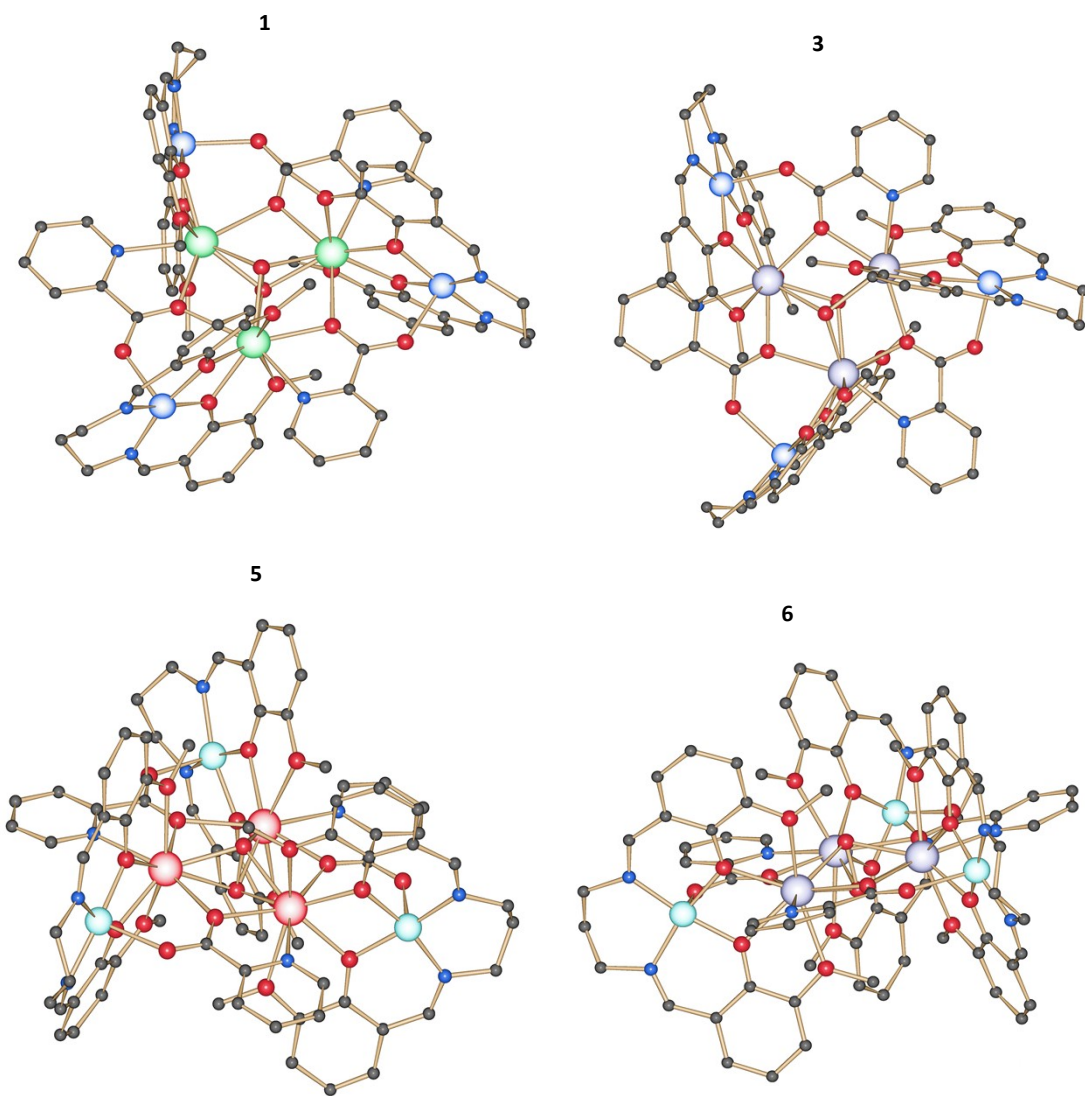

**Figure S1:** Molecular structure of complexes **1**, **3**, **5**, and **6**.

**Table S1:** Selected structural parameters of complexes **1-9**.

| <b>Structural parameters in relation to the <math>J_1</math> ( Dy<sup>III</sup>... Dy<sup>III</sup> ) interaction {Zn<sub>3</sub>Dy<sub>3</sub>} complex</b>                                                             |                |                  |                |                         |                    |
|--------------------------------------------------------------------------------------------------------------------------------------------------------------------------------------------------------------------------|----------------|------------------|----------------|-------------------------|--------------------|
| *Peroxide oxygen atom.                                                                                                                                                                                                   |                |                  |                |                         |                    |
|                                                                                                                                                                                                                          | Bond Length(Å) |                  | Bond Angle (°) |                         | Dihedral Angle (°) |
| Zn2-μ2 O3                                                                                                                                                                                                                | 2.059          | Zn2-μ2 O3-Dy1    | 105.9          | Zn2-μ2 O3-Dy1-μ2 O4     | 17.4               |
| Zn2-μ2 O4                                                                                                                                                                                                                | 2.061          | Zn2-μ2 O4-Dy1    | 105.7          |                         |                    |
| Dy1-μ2 O3                                                                                                                                                                                                                | 2.301          |                  |                |                         |                    |
| Dy1-μ2 O4                                                                                                                                                                                                                | 2.301          |                  |                |                         |                    |
| Zn9-μ2 O10                                                                                                                                                                                                               | 2.059          | Zn9-μ2 O10-Dy8   | 105.8          | Zn9-μ2 O10-Dy8-μ2 O11   | 18.4               |
| Zn 9-μ2 O11                                                                                                                                                                                                              | 2.061          | Zn9-μ2 O11-Dy8   | 105.7          |                         |                    |
| Dy8-μ2 O10                                                                                                                                                                                                               | 2.301          |                  |                |                         |                    |
| Dy8-μ2 O11                                                                                                                                                                                                               | 2.301          |                  |                |                         |                    |
| Zn14-μ2 O15                                                                                                                                                                                                              | 2.059          | Zn14-μ2 O15-Dy13 | 105.8          | Zn14-μ2 O15-Dy13-μ2 O16 | 17.4               |
| Zn14-μ2 O16                                                                                                                                                                                                              | 2.061          | Zn14-μ2 O16-Dy13 | 105.7          |                         |                    |
| Dy13-μ2 O15                                                                                                                                                                                                              | 2.301          |                  |                |                         |                    |
| Dy13-μ2 O16                                                                                                                                                                                                              | 2.301          |                  |                |                         |                    |
| Dy1-μ3 O6*                                                                                                                                                                                                               | 2.358          | Dy1-μ3 O6*-Dy8   | 109.4          | Dy1-μ2 O5-Dy13-μ3 O6*   | 154.5              |
| Dy1-μ3 O7*                                                                                                                                                                                                               | 2.351          | Dy1-μ3 O7*-Dy8   | 110.1          | Dy1-μ2 O5-Dy13-μ3 O7*   | 20.2               |
| Dy8-μ3 O6*                                                                                                                                                                                                               | 2.358          | Dy1-μ3 O6*-Dy13  | 109.4          | Dy1-μ2 O12-Dy8-μ3 O6*   | 20.7               |
| Dy8-μ3 O7*                                                                                                                                                                                                               | 2.351          | Dy1-μ3 O7*-Dy13  | 110.1          | Dy1-μ2 O12-Dy8-μ3 O7*   | 20.6               |
| Dy13-μ3 O6*                                                                                                                                                                                                              | 2.358          | Dy8-μ3 O6*-Dy13  | 109.4          | Dy8-μ2 O17-Dy13-μ3 O6*  | 22.9               |
| Dy13-μ3 O7*                                                                                                                                                                                                              | 2.351          | Dy8-μ3 O7*-Dy13  | 110.1          | Dy8-μ2 O17-Dy13-μ3 O7*  | 23.1               |
| Dy1-μ2 O5                                                                                                                                                                                                                | 2.556          | Dy1-μ2 O5-Dy13   | 102.2          |                         |                    |
| Dy1-μ2 O12                                                                                                                                                                                                               | 2.389          | Dy1-μ2 O12-Dy8   | 102.2          |                         |                    |
| Dy8-μ2 O12                                                                                                                                                                                                               | 2.556          | Dy8-μ2 O17-Dy13  | 102.2          |                         |                    |
| Dy8-μ2 O17                                                                                                                                                                                                               | 2.389          |                  |                |                         |                    |
| Dy13-μ2 O5                                                                                                                                                                                                               | 2.389          |                  |                |                         |                    |
| Dy13-μ2 O17                                                                                                                                                                                                              | 2.556          |                  |                |                         |                    |
| <b>Structural parameters in relation to the <math>J_1</math> ( Dy<sup>III</sup>... Dy<sup>III</sup> ) &amp; <math>J_2</math> (Cu<sup>II</sup>...Dy<sup>III</sup>) interaction {Cu<sub>3</sub>Dy<sub>3</sub>} complex</b> |                |                  |                |                         |                    |
| Cu2-μ2 O3                                                                                                                                                                                                                | 1.973          | Cu2-μ2 O3-Dy1    | 107.1          | Cu2-μ2 O3-Dy1-μ2 O4     | 14.4               |
| Cu2-μ2 O4                                                                                                                                                                                                                | 1.974          | Cu2-μ2 O4-Dy1    | 106.8          |                         |                    |
| Dy1-μ2 O3                                                                                                                                                                                                                | 2.315          |                  |                |                         |                    |
| Dy1-μ2 O4                                                                                                                                                                                                                | 2.321          |                  |                |                         |                    |
| Cu9-μ2 O10                                                                                                                                                                                                               | 1.973          | Cu9-μ2 O10-Dy8   | 107.1          | Cu9-μ2 O10-Dy8-μ2 O11   | 13.2               |
| Cu9-μ2 O11                                                                                                                                                                                                               | 1.974          | Cu9-μ2 O11-Dy8   | 106.8          |                         |                    |
| Dy8-μ2 O10                                                                                                                                                                                                               | 2.315          |                  |                |                         |                    |
| Dy8-μ2 O11                                                                                                                                                                                                               | 2.321          |                  |                |                         |                    |
| Cu14-μ2 O15                                                                                                                                                                                                              | 1.973          | Cu14-μ2 O15-Dy13 | 107.1          | Cu14-μ2 O15-Dy13-μ2 O16 | 13.2               |
| Cu14-μ2 O16                                                                                                                                                                                                              | 1.974          | Cu14-μ2 O16-Dy13 | 106.8          |                         |                    |
| Dy13-μ2 O15                                                                                                                                                                                                              | 2.315          |                  |                |                         |                    |
| Dy13-μ2 O16                                                                                                                                                                                                              | 2.321          |                  |                |                         |                    |
| Dy1-μ3 O6*                                                                                                                                                                                                               | 2.345          | Dy1-μ3 O6*-Dy8   | 109.4          | Dy1-μ2 O5-Dy8-μ3O6*     | 20.3               |
| Dy1-μ3 O7*                                                                                                                                                                                                               | 2.345          | Dy1-μ3 O7*-Dy8   | 109.4          | Dy1-μ2 O5-Dy8-μ3O7*     | 20.9               |
| Dy8-μ3 O6*                                                                                                                                                                                                               | 2.346          | Dy1-μ3 O6*-Dy13  | 109.4          | Dy1-μ2 O17-Dy13-μ3O6*   | 20.7               |
| Dy8-μ3 O7*                                                                                                                                                                                                               | 2.345          | Dy1-μ3 O7*-Dy13  | 109.4          | Dy1-μ2 O17-Dy13-μ3O7*   | 21.4               |
| Dy13-μ3 O6*                                                                                                                                                                                                              | 2.346          | Dy8-μ3 O6*-Dy13  | 109.4          | Dy8-μ2 O12-Dy13-μ3O6*   | -20.3              |
| Dy13-μ3 O7*                                                                                                                                                                                                              | 2.345          | Dy8-μ3 O7*-Dy13  | 109.4          | Dy8-μ2 O12-Dy13-μ3O7*   | 20.9               |

|                                                                                                                                                                                                                        |         |                          |       |                                        |      |
|------------------------------------------------------------------------------------------------------------------------------------------------------------------------------------------------------------------------|---------|--------------------------|-------|----------------------------------------|------|
| Dy1- $\mu$ 2 O5                                                                                                                                                                                                        | 2.527   | Dy1- $\mu$ 2 O5- Dy 8    | 102.8 |                                        |      |
| Dy1- $\mu$ 2 O17                                                                                                                                                                                                       | 2.371   | Dy1- $\mu$ 2 O17- Dy 13  | 102.8 |                                        |      |
| Dy8- $\mu$ 2 O5                                                                                                                                                                                                        | 178.469 | Dy8- $\mu$ 2 O12- Dy13   | 102.8 |                                        |      |
| Dy8- $\mu$ 2 O12                                                                                                                                                                                                       | 2.527   |                          |       |                                        |      |
| Dy13- $\mu$ 2 O12                                                                                                                                                                                                      | 2.371   |                          |       |                                        |      |
| Dy13- $\mu$ 2 O17                                                                                                                                                                                                      | 2.527   |                          |       |                                        |      |
| <b>Structural parameters in relation to the <math>J_1</math> (Dy<sup>III</sup>... Dy<sup>III</sup>) &amp; <math>J_2</math> (Ni<sup>II</sup>...Dy<sup>III</sup>) interaction {Ni<sub>3</sub>Dy<sub>3</sub>} complex</b> |         |                          |       |                                        |      |
| Ni2-N16                                                                                                                                                                                                                | 2.007   | Ni2-N16-O3               | 120.4 | Ni2-N22- $\mu$ 2 O5-Dy1                | 55.2 |
| Ni2-N19                                                                                                                                                                                                                | 2.011   | Ni2-N19-O4               | 123.6 | Ni2-N10- $\mu$ 2 O4-Dy1                | 45.9 |
| Ni2-N22                                                                                                                                                                                                                | 2.017   | Ni2-N22-O5               | 122.9 | Ni2-N16- $\mu$ 2 O3-Dy1                | 55.8 |
| Dy1-O3                                                                                                                                                                                                                 | 2.411   | Dy1-O3-N16               | 116.1 | Ni61-N73- $\mu$ 2 O62-Dy60             | 55.8 |
| Dy1-O4                                                                                                                                                                                                                 | 2.366   | Dy1-O4-N19               | 119.4 | Ni61-N76- $\mu$ 2 O63-Dy60             | 45.9 |
| Dy1-O5                                                                                                                                                                                                                 | 2.384   | Dy1-O5-N22               | 115.6 | Ni61-N79- $\mu$ 2 O64-Dy60             | 55.2 |
| Ni61-N73                                                                                                                                                                                                               | 2.007   | Ni61-N73-O62             | 120.4 | Ni118-N130- $\mu$ 2 O119-Dy117         | 55.8 |
| N61-N76                                                                                                                                                                                                                | 2.011   | N61-N76-O63              | 123.6 | Ni118-N136- $\mu$ 2 O121-Dy117         | 55.2 |
| Ni61-N79                                                                                                                                                                                                               | 2.017   | Ni61-N79-O64             | 122.9 | Ni118-N133- $\mu$ 2 O120-Dy117         | 45.9 |
| Dy60-O62                                                                                                                                                                                                               | 2.411   | Dy60-O62-N73             | 122.9 |                                        |      |
| Dy60-O63                                                                                                                                                                                                               | 2.366   | Dy60-O63-N76             | 119.4 |                                        |      |
| Dy60-O64                                                                                                                                                                                                               | 2.384   | Dy60-O64-N79             | 115.6 |                                        |      |
| Ni118-N130                                                                                                                                                                                                             | 2.007   | Ni118-N130-O119          | 120.4 |                                        |      |
| Ni118-N133                                                                                                                                                                                                             | 2.011   | Ni118-N133-O120          | 123.6 |                                        |      |
| Ni118-N136                                                                                                                                                                                                             | 2.017   | Ni118-N136-O121          | 122.9 |                                        |      |
| Dy117-O119                                                                                                                                                                                                             | 2.411   | Dy117-O119-N130          | 116.1 |                                        |      |
| Dy60-O120                                                                                                                                                                                                              | 2.366   | Dy60-O120-N133           | 119.5 |                                        |      |
| Dy60-O121                                                                                                                                                                                                              | 2.384   | Dy60-O121-N136           | 115.7 |                                        |      |
|                                                                                                                                                                                                                        |         |                          |       |                                        |      |
| Dy1- $\mu$ 3 O9*                                                                                                                                                                                                       | 2.323   | Dy1- $\mu$ 3 O9*-Dy60    | 110.3 | Dy1- $\mu$ 2 O3-Dy117- $\mu$ 3 O9*     | 11.3 |
| Dy1- $\mu$ 3 O10*                                                                                                                                                                                                      | 2.328   | Dy1- $\mu$ 3 O9*-Dy117   | 110.3 | Dy1- $\mu$ 2 O3-Dy117- $\mu$ 3 O10*    | 28.6 |
| Dy60- $\mu$ 3 O9*                                                                                                                                                                                                      | 2.323   | Dy60- $\mu$ 3 O9*-Dy117  | 110.3 | Dy1- $\mu$ 2 O62-Dy60- $\mu$ 3 O9*     | 11.3 |
| Dy60- $\mu$ 3 O10*                                                                                                                                                                                                     | 2.328   | Dy1- $\mu$ 3 O10*-Dy60   | 109.9 | Dy1- $\mu$ 2 O62-Dy60- $\mu$ 3 O10*    | 30.9 |
| Dy117- $\mu$ 3 O9*                                                                                                                                                                                                     | 2.323   | Dy1- $\mu$ 3 O10*-Dy117  | 109.9 | Dy60- $\mu$ 2 O119-Dy117- $\mu$ 3 O9*  | 12.2 |
| Dy117- $\mu$ 3 O10*                                                                                                                                                                                                    | 2.328   | Dy60- $\mu$ 3 O10*-Dy117 | 109.9 | Dy60- $\mu$ 2 O119-Dy117- $\mu$ 3 O10* | 28.6 |
|                                                                                                                                                                                                                        |         |                          |       |                                        |      |
| Dy1- $\mu$ 2 O3                                                                                                                                                                                                        | 2.411   | Dy1- $\mu$ 2 O62-Dy60    | 104.2 |                                        |      |
| Dy1- $\mu$ 2 O62                                                                                                                                                                                                       | 2.422   | Dy1- $\mu$ 2 O3-Dy117    | 104.2 |                                        |      |
| Dy60- $\mu$ 2 O62                                                                                                                                                                                                      | 2.411   | Dy60- $\mu$ 2 O119-Dy117 | 104.2 |                                        |      |
| Dy60- $\mu$ 2 O119                                                                                                                                                                                                     | 2.422   |                          |       |                                        |      |
| Dy117- $\mu$ 2 O3                                                                                                                                                                                                      | 2.422   |                          |       |                                        |      |
| Dy117- $\mu$ 2 O119                                                                                                                                                                                                    | 2.411   |                          |       |                                        |      |
| <b>Structural parameters in relation to the <math>J_1</math> ( Tb<sup>III</sup>... Tb<sup>III</sup>) interaction {Zn<sub>3</sub>Tb<sub>3</sub>} complex</b>                                                            |         |                          |       |                                        |      |
| Zn2- $\mu$ 2 O3                                                                                                                                                                                                        | 2.059   | Zn2- $\mu$ 2 O3-Tb1      | 106.3 | Zn2- $\mu$ 2 O3-Tb1- $\mu$ 2 O4        | 18.1 |
| Zn2- $\mu$ 2 O4                                                                                                                                                                                                        | 2.056   | Zn2- $\mu$ 2 O4-Tb1      | 106.1 |                                        |      |
| Tb1- $\mu$ 2 O3                                                                                                                                                                                                        | 2.291   |                          |       |                                        |      |
| Tb1- $\mu$ 2 O4                                                                                                                                                                                                        | 2.311   |                          |       |                                        |      |
| Zn9- $\mu$ 2 O10                                                                                                                                                                                                       | 2.059   | Zn9- $\mu$ 2 O10-Tb8     | 106.3 | Zn9- $\mu$ 2 O10-Tb8- $\mu$ 2 O11      | 19.1 |
| Zn 9- $\mu$ 2 O11                                                                                                                                                                                                      | 2.056   | Zn9- $\mu$ 2 O11-Tb8     | 106.1 |                                        |      |
| Tb8- $\mu$ 2 O10                                                                                                                                                                                                       | 2.291   |                          |       |                                        |      |
| Tb8- $\mu$ 2 O11                                                                                                                                                                                                       | 2.302   |                          |       |                                        |      |
| Zn14- $\mu$ 2 O15                                                                                                                                                                                                      | 2.059   | Zn14- $\mu$ 2 O15-Tb13   | 106.3 | Zn14- $\mu$ 2 O15-Tb13- $\mu$ 2 O16    | 19.1 |
| Zn14- $\mu$ 2 O16                                                                                                                                                                                                      | 2.056   | Zn14- $\mu$ 2 O16-Tb13   | 106.1 |                                        |      |

|                                                                                                                                                                                                                          |                |                        |                |                                    |                    |
|--------------------------------------------------------------------------------------------------------------------------------------------------------------------------------------------------------------------------|----------------|------------------------|----------------|------------------------------------|--------------------|
| Tb13- $\mu$ 2 O15                                                                                                                                                                                                        | 2.291          |                        |                |                                    |                    |
| Tb13- $\mu$ 2 O16                                                                                                                                                                                                        | 2.302          |                        |                |                                    |                    |
|                                                                                                                                                                                                                          |                |                        |                |                                    |                    |
| Tb1- $\mu$ 3 O6*                                                                                                                                                                                                         | 2.374          | Tb1- $\mu$ 3 O6*-Tb8   | 109.2          | Tb1- $\mu$ 2 O17-Tb13- $\mu$ 3 O6* | 21.1               |
| Tb1- $\mu$ 3 O7*                                                                                                                                                                                                         | 2.358          | Tb1- $\mu$ 3 O7*-Tb8   | 110.3          | Tb1- $\mu$ 2 O17-Tb13- $\mu$ 3 O7* | 21.5               |
| OTb8- $\mu$ 3 O6*                                                                                                                                                                                                        | 2.374          | Tb1- $\mu$ 3 O6*-Tb13  | 109.2          | Tb1- $\mu$ 2 O5-Tb8- $\mu$ 3 O6*   | 20.6               |
| Tb8- $\mu$ 3 O7*                                                                                                                                                                                                         | 2.358          | Tb1- $\mu$ 3 O7*-Tb13  | 110.3          | Tb1- $\mu$ 2 O5-Tb8- $\mu$ 3 O7*   | 19.8               |
| Tb13- $\mu$ 3 O6*                                                                                                                                                                                                        | 2.374          | Tb8- $\mu$ 3 O6*-Tb13  | 109.2          | Tb8- $\mu$ 2 O12-Tb13- $\mu$ 3 O6* | 20.6               |
| Tb13- $\mu$ 3 O7*                                                                                                                                                                                                        | 2.358          | Tb8- $\mu$ 3 O7*-Tb13  | 110.3          | Tb8- $\mu$ 2 O12-Tb13- $\mu$ 3 O7* | 19.8               |
|                                                                                                                                                                                                                          |                |                        |                |                                    |                    |
| Tb1- $\mu$ 2 O5                                                                                                                                                                                                          | 2.584          | Tb1- $\mu$ 2 O17-Tb13  | 102.1          |                                    |                    |
| Tb1- $\mu$ 2 O17                                                                                                                                                                                                         | 2.391          | Tb1- $\mu$ 2 O5-Tb8    | 102.1          |                                    |                    |
| Tb8- $\mu$ 2 O12                                                                                                                                                                                                         | 2.584          | Tb8- $\mu$ 2 O12-Tb13  | 102.1          |                                    |                    |
| Tb8- $\mu$ 2 O5                                                                                                                                                                                                          | 2.391          |                        |                |                                    |                    |
| Tb13- $\mu$ 2 O17                                                                                                                                                                                                        | 2.584          |                        |                |                                    |                    |
| Tb13- $\mu$ 2 O12                                                                                                                                                                                                        | 2.391          |                        |                |                                    |                    |
| <b>Structural parameters in relation to the <math>J_1</math> (Tb<sup>III</sup>...Tb<sup>III</sup>) &amp; <math>J_2</math> (Cu<sup>I</sup>...Tb<sup>III</sup>) interaction for {Cu<sub>3</sub>Tb<sub>3</sub>} complex</b> |                |                        |                |                                    |                    |
| Cu9- $\mu$ 2 O11                                                                                                                                                                                                         | 1.963          | Cu9- $\mu$ 2 O11-Tb8   | 107            | Cu9- $\mu$ 2 O11-Tb8- $\mu$ 2O10   | 13.6               |
| Cu9- $\mu$ 2 O10                                                                                                                                                                                                         | 1.980          | Cu9- $\mu$ 2 O10-Tb8   | 107.2          |                                    |                    |
| Tb8- $\mu$ 2 O11                                                                                                                                                                                                         | 2.331          |                        |                |                                    |                    |
| Tb8- $\mu$ 2 O10                                                                                                                                                                                                         | 2.311          |                        |                |                                    |                    |
| Cu2- $\mu$ 2 O3                                                                                                                                                                                                          | 1.981          | Cu2- $\mu$ 2 O3-Tb1    | 107.2          | Cu2- $\mu$ 2 O3-Tb1- $\mu$ 2O4     | 13.6               |
| Cu2- $\mu$ 2 O4                                                                                                                                                                                                          | 1.963          | Cu2- $\mu$ 2 O4-Tb1    | 107.1          |                                    |                    |
| Tb1- $\mu$ 2 O3                                                                                                                                                                                                          | 2.311          |                        |                |                                    |                    |
| Tb1- $\mu$ 2 O4                                                                                                                                                                                                          | 2.331          |                        |                |                                    |                    |
| Cu14- $\mu$ 2 O15                                                                                                                                                                                                        | 1.981          | Cu14- $\mu$ 2 O15-Tb13 | 107.2          | Cu14- $\mu$ 2 O15-Tb13- $\mu$ 2O16 | 14.9               |
| Cu14- $\mu$ 2 O16                                                                                                                                                                                                        | 1.963          | Cu14- $\mu$ 2 O16-Tb13 | 107.1          |                                    |                    |
| Tb13- $\mu$ 2 O15                                                                                                                                                                                                        | 2.311          |                        |                |                                    |                    |
| Tb13- $\mu$ 2 O16                                                                                                                                                                                                        | 2.331          |                        |                |                                    |                    |
|                                                                                                                                                                                                                          |                |                        |                |                                    |                    |
| Tb1- $\mu$ 3 O6*                                                                                                                                                                                                         | 2.363          | Tb1- $\mu$ 3 O6*-Tb8   | 109.4          | Tb1- $\mu$ 2 O5-Tb8- $\mu$ 3O7*    | 20.8               |
| Tb1- $\mu$ 3 O7*                                                                                                                                                                                                         | 2.353          | Tb1- $\mu$ 3 O7*-Tb8   | 110.1          | Tb1- $\mu$ 2 O5-Tb8- $\mu$ 3O6*    | 21.4               |
| Tb8- $\mu$ 3 O6*                                                                                                                                                                                                         | 2.363          | Tb1- $\mu$ 3 O6*-Tb13  | 109.4          | Tb1- $\mu$ 2 O5-Tb13- $\mu$ 3O6*   | 22.6               |
| Tb8- $\mu$ 3 O7*                                                                                                                                                                                                         | 2.353          | Tb1- $\mu$ 3 O7*-Tb13  | 110.1          | Tb1- $\mu$ 2 O5-Tb13- $\mu$ 3O7*   | 20.4               |
| Tb13- $\mu$ 3 O6*                                                                                                                                                                                                        | 2.363          | Tb8- $\mu$ 3 O6*-Tb13  | 109.4          | Tb1- $\mu$ 2 O17-Tb13- $\mu$ 3O6*  | 20.2               |
| Tb13- $\mu$ 3 O7*                                                                                                                                                                                                        | 2.353          | Tb8- $\mu$ 3 O7*-Tb13  | 110.1          | Tb8- $\mu$ 2 O17-Tb13- $\mu$ 3O7*  | 20.4               |
|                                                                                                                                                                                                                          |                |                        |                |                                    |                    |
| Tb1- $\mu$ 2 O5                                                                                                                                                                                                          | 2.551          | Tb1- $\mu$ 2 O12-Tb8   | 102.9          |                                    |                    |
| Tb1- $\mu$ 2 O12                                                                                                                                                                                                         | 2.378          | Tb1- $\mu$ 2 O5-Tb13   | 102.9          |                                    |                    |
| Tb8- $\mu$ 2 O17                                                                                                                                                                                                         | 2.378          | Tb8- $\mu$ 2 O17-Tb13  | 102.9          |                                    |                    |
| Tb8- $\mu$ 2 O12                                                                                                                                                                                                         | 2.551          |                        |                |                                    |                    |
| Tb13- $\mu$ 2 O5                                                                                                                                                                                                         | 2.378          |                        |                |                                    |                    |
| Tb13- $\mu$ 2 O17                                                                                                                                                                                                        | 2.551          |                        |                |                                    |                    |
| <b>Structural parameters in relation to the <math>J_1</math> (Gd<sup>III</sup>...Gd<sup>III</sup>) interaction for {Zn<sub>3</sub>Gd<sub>3</sub>} complex</b>                                                            |                |                        |                |                                    |                    |
|                                                                                                                                                                                                                          | Bond Length(Å) |                        | Bond Angle (°) |                                    | Dihedral Angle (°) |
| Zn9- $\mu$ 2 O11                                                                                                                                                                                                         | 2.043          | Zn9- $\mu$ 2 O11-Gd8   | 106.2          | Zn9- $\mu$ 2 O11-Gd8- $\mu$ 2 O10  | 17.5               |
| Zn9- $\mu$ 2 O10                                                                                                                                                                                                         | 2.054          | Zn9- $\mu$ 2 O10-Gd8   | 106.5          |                                    |                    |
| Gd8- $\mu$ 2 O11                                                                                                                                                                                                         | 2.326          |                        |                |                                    |                    |
| Gd8- $\mu$ 2 O10                                                                                                                                                                                                         | 2.307          |                        |                |                                    |                    |
| Zn2- $\mu$ 2 O3                                                                                                                                                                                                          | 2.054          | Zn2- $\mu$ 2 O3-Gd1    | 106.5          | Zn2- $\mu$ 2 O3-Gd1- $\mu$ 2 O4    | 158.5              |
| Zn2- $\mu$ 2 O4                                                                                                                                                                                                          | 2.043          | Zn2- $\mu$ 2 O4-Gd1    | 106.2          |                                    |                    |
| Gd1- $\mu$ 2 O3                                                                                                                                                                                                          | 2.307          |                        |                |                                    |                    |

|                                                                                                                                                                                                                          |        |                        |       |                                     |       |
|--------------------------------------------------------------------------------------------------------------------------------------------------------------------------------------------------------------------------|--------|------------------------|-------|-------------------------------------|-------|
| Gd1- $\mu$ 2 O4                                                                                                                                                                                                          | 2.326  |                        |       |                                     |       |
| Zn14- $\mu$ 2 O15                                                                                                                                                                                                        | 2.054  | Zn14- $\mu$ 2 O15-Gd13 | 106.5 | Zn14- $\mu$ 2 O15-Gd13- $\mu$ 2 O16 | 158.5 |
| Zn14- $\mu$ 2 O16                                                                                                                                                                                                        | 2.043  | Zn14- $\mu$ 2 O16-Gd13 | 106.2 |                                     |       |
| Gd13- $\mu$ 2 O15                                                                                                                                                                                                        | 2.307  |                        |       |                                     |       |
| Gd13- $\mu$ 2 O16                                                                                                                                                                                                        | 2.326  |                        |       |                                     |       |
|                                                                                                                                                                                                                          |        |                        |       |                                     |       |
| Gd1- $\mu$ 3 O6*                                                                                                                                                                                                         | 2.386  | Gd1- $\mu$ 3 O6*-Gd8   | 109.5 | Gd1- $\mu$ 2 O5-Gd8- $\mu$ 3 O6*    | 20.3  |
| Gd1- $\mu$ 3 O7*                                                                                                                                                                                                         | 2.371  | Gd1- $\mu$ 3 O7*-Gd8   | 110.5 | Gd1- $\mu$ 2 O5-Gd8- $\mu$ 3 O7*    | 22.6  |
| Gd8- $\mu$ 3 O6*                                                                                                                                                                                                         | 2.386  | Gd1- $\mu$ 3 O6*-Gd13  | 109.5 | Gd1- $\mu$ 2 O17-Gd13- $\mu$ 3 O6*  | 20.6  |
| Gd8- $\mu$ 3 O7*                                                                                                                                                                                                         | 2.371  | Gd1- $\mu$ 3 O7*-Gd13  | 110.5 | Gd1- $\mu$ 2 O17-Gd13- $\mu$ 3 O7*  | 21.5  |
| Gd13- $\mu$ 3 O6*                                                                                                                                                                                                        | 2.386  | Gd8- $\mu$ 3 O6*-Gd13  | 109.5 | Gd8- $\mu$ 2 O12-Gd13- $\mu$ 2 O6*  | 20.6  |
| Gd13- $\mu$ 3 O7*                                                                                                                                                                                                        | 2.371  | Gd8- $\mu$ 3 O7*-Gd13  | 110.5 | Gd8- $\mu$ 2 O12-Gd13- $\mu$ 2 O7*  | 21.5  |
|                                                                                                                                                                                                                          |        |                        |       |                                     |       |
| Gd1- $\mu$ 2 O5                                                                                                                                                                                                          | 2.585  | Gd1- $\mu$ 2 O5-Gd8    | 102.3 |                                     |       |
| Gd1- $\mu$ 2 O17                                                                                                                                                                                                         | 2.415  | Gd1- $\mu$ 2 O17-Gd13  | 102.3 |                                     |       |
| Gd8- $\mu$ 2 O12                                                                                                                                                                                                         | 2.585  | Gd8- $\mu$ 2 O12-Gd13  | 102.3 |                                     |       |
| Gd8- $\mu$ 2 O5                                                                                                                                                                                                          | 2.415  |                        |       |                                     |       |
| Gd13- $\mu$ 2 O12                                                                                                                                                                                                        | 2.415  |                        |       |                                     |       |
| Gd13- $\mu$ 2 O17                                                                                                                                                                                                        | 2.585  |                        |       |                                     |       |
| <b>Structural parameters in relation to the <math>J_1</math> ( Gd<sup>III</sup>... Gd<sup>III</sup> ) &amp; <math>J_2</math> (Ni<sup>II</sup>...Gd<sup>III</sup>) interaction {Ni<sub>3</sub>Gd<sub>3</sub>} complex</b> |        |                        |       |                                     |       |
| Ni2-N10                                                                                                                                                                                                                  | 2.0353 | Ni2-N10-O3             | 123.7 | Ni2-N10- $\mu$ 2 O3-Gd1             | 53.1  |
| Ni2-N11                                                                                                                                                                                                                  | 2.014  | Ni2-N11-O4             | 122.8 | Ni2-N11- $\mu$ 2 O4-Gd1             | 47.1  |
| Ni2-N12                                                                                                                                                                                                                  | 2.014  | Ni2-N12-O5             | 121.5 | Ni2-N12- $\mu$ 2 O5-Dy1             | 56.8  |
| Gd1-O3                                                                                                                                                                                                                   | 2.406  | Gd1-O3-N10             | 116.3 | Ni32-N38- $\mu$ 2 O33-Gd31          | 53.1  |
| Gd1-O4                                                                                                                                                                                                                   | 2.379  | Gd1-O4-N11             | 115.4 | Ni32-N39- $\mu$ 2 O34-Gd31          | 47.1  |
| Gd1-O5                                                                                                                                                                                                                   | 2.441  | Gd1-O5-N12             | 119.9 | Ni32-N40- $\mu$ 2 O35-Gd31          | 56.8  |
| Ni32-N38                                                                                                                                                                                                                 | 2.035  | Ni32-N38-O33           | 123.7 | Ni60-N66- $\mu$ 2 O61- Gd59         | 53.1  |
| Ni32-N39                                                                                                                                                                                                                 | 2.014  | N32-N39-O34            | 122.8 | Ni60-N67- $\mu$ 2 O62-Gd59          | 47.1  |
| Ni32-N40                                                                                                                                                                                                                 | 2.014  | Ni32-N40-O34           | 121.5 | Ni60-N68- $\mu$ 2 O63-Gd59          | 56.8  |
| Gd31-O33                                                                                                                                                                                                                 | 2.406  | Gd31-O33-N38           | 116.3 |                                     |       |
| Gd31-O34                                                                                                                                                                                                                 | 2.379  | Gd31-O34-N39           | 119.9 |                                     |       |
| Gd31-O35                                                                                                                                                                                                                 | 2.441  | Gd31-O35-N40           | 115.4 |                                     |       |
| Ni60-N66                                                                                                                                                                                                                 | 2.014  | Ni60-N66-O61           | 123.7 |                                     |       |
| Ni60-N67                                                                                                                                                                                                                 | 2.014  | Ni60-N67-O62           | 122.8 |                                     |       |
| Ni60-N68                                                                                                                                                                                                                 | 2.035  | Ni60-N68-O63           | 121.5 |                                     |       |
| Gd59-O61                                                                                                                                                                                                                 | 2.406  | Gd59-O61-N66           | 116.3 |                                     |       |
| Gd59-O62                                                                                                                                                                                                                 | 2.379  | Gd59-O62-N67           | 119.9 |                                     |       |
| Gd59-O63                                                                                                                                                                                                                 | 2.441  | Gd59-O63-N68           | 115.4 |                                     |       |
|                                                                                                                                                                                                                          |        |                        |       |                                     |       |
| Gd1- $\mu$ 3 O6*                                                                                                                                                                                                         | 2.358  | Gd1- $\mu$ 3 O6*Gd31   | 110.1 | Gd1- $\mu$ 2 O5-Gd59- $\mu$ 3 O6*   | 11.9  |
| Gd1- $\mu$ 3 O7*                                                                                                                                                                                                         | 2.364  | Gd1- $\mu$ 3 O7*Gd31   | 109.7 | Gd1- $\mu$ 2 O5-Gd59- $\mu$ 3 O7*   | 30.6  |
| Gd31- $\mu$ 3 O6*                                                                                                                                                                                                        | 2.358  | Gd59- $\mu$ 3 O6*Gd31  | 110.1 | Gd1- $\mu$ 2 O35-Gd31- $\mu$ 3 O6*  | 12.8  |
| Gd31- $\mu$ 3 O7*                                                                                                                                                                                                        | 2.364  | Gd59- $\mu$ 3 O7*Gd31  | 109.7 | Gd1- $\mu$ 2 O35-Gd31- $\mu$ 3 O7*  | 30.7  |
| Gd59- $\mu$ 3 O6*                                                                                                                                                                                                        | 2.357  | Gd59- $\mu$ 3 O6*Gd1   | 110.1 | Gd31- $\mu$ 2 O63-Gd59- $\mu$ 3 O6* | 12.8  |
| Gd59- $\mu$ 3 O7*                                                                                                                                                                                                        | 2.364  | Gd59- $\mu$ 3 O7*Gd1   | 109.7 | Gd31- $\mu$ 2 O63-Gd59- $\mu$ 3 O7* | 30.7  |
|                                                                                                                                                                                                                          |        |                        |       |                                     |       |
| Gd1- $\mu$ 2 O5                                                                                                                                                                                                          | 2.441  |                        |       |                                     |       |
| Gd1- $\mu$ 2 O35                                                                                                                                                                                                         | 2.451  |                        |       |                                     |       |
| Gd31 $\mu$ 3 O63                                                                                                                                                                                                         | 2.451  |                        |       |                                     |       |
| Gd31- $\mu$ 2 O35                                                                                                                                                                                                        | 2.441  |                        |       |                                     |       |
| Gd59- $\mu$ 2 O5                                                                                                                                                                                                         | 2.451  |                        |       |                                     |       |
| Gd59- $\mu$ 2 O63                                                                                                                                                                                                        | 2.441  |                        |       |                                     |       |

**Table S2:** The  $g$ -tensors for the lowest Kramers doublets of Dy(III) ions in  $\text{Zn}_3\text{Dy}_3(\mathbf{1})$ :

| Kramer Doublets | Dy1            | Dy2            | Dy3            |
|-----------------|----------------|----------------|----------------|
| 1               | $g_x = 0.000$  | $g_x = 0.000$  | $g_x = 0.000$  |
|                 | $g_y = 0.003$  | $g_y = 0.003$  | $g_y = 0.003$  |
|                 | $g_z = 19.688$ | $g_z = 19.688$ | $g_z = 19.712$ |
| 2               | $g_x = 0.503$  | $g_x = 0.499$  | $g_x = 0.534$  |
|                 | $g_y = 1.411$  | $g_y = 1.429$  | $g_y = 1.496$  |
|                 | $g_z = 16.500$ | $g_z = 16.387$ | $g_z = 16.367$ |
| 3               | $g_x = 0.760$  | $g_x = 0.679$  | $g_x = 0.633$  |
|                 | $g_y = 1.858$  | $g_y = 1.806$  | $g_y = 1.868$  |
|                 | $g_z = 13.156$ | $g_z = 13.031$ | $g_z = 13.004$ |
| 4               | $g_x = 0.218$  | $g_x = 0.171$  | $g_x = 0.123$  |
|                 | $g_y = 3.134$  | $g_y = 3.052$  | $g_y = 3.139$  |
|                 | $g_z = 11.035$ | $g_z = 11.052$ | $g_z = 11.052$ |
| 5               | $g_x = 9.076$  | $g_x = 8.979$  | $g_x = 9.095$  |
|                 | $g_y = 6.644$  | $g_y = 6.645$  | $g_y = 6.628$  |
|                 | $g_z = 2.639$  | $g_z = 2.642$  | $g_z = 2.641$  |
| 6               | $g_x = 1.825$  | $g_x = 1.825$  | $g_x = 1.818$  |
|                 | $g_y = 2.585$  | $g_y = 2.543$  | $g_y = 2.632$  |
|                 | $g_z = 17.116$ | $g_z = 17.193$ | $g_z = 16.986$ |
| 7               | $g_x = 0.843$  | $g_x = 0.830$  | $g_x = 0.779$  |
|                 | $g_y = 1.413$  | $g_y = 1.418$  | $g_y = 1.414$  |
|                 | $g_z = 12.836$ | $g_z = 12.756$ | $g_z = 12.832$ |
| 8               | $g_x = 0.332$  | $g_x = 0.343$  | $g_x = 0.332$  |
|                 | $g_y = 1.215$  | $g_y = 1.260$  | $g_y = 1.246$  |
|                 | $g_z = 16.924$ | $g_z = 16.897$ | $g_z = 16.891$ |

**Table S3:** The  $g$ -tensors for the lowest Ising doublets of Tb(III) ions in  $\text{Zn}_3\text{Tb}_3(\mathbf{2})$ :

| Kramer Doublets | Tb <sub>1</sub> | Tb <sub>2</sub> | Tb <sub>3</sub> |
|-----------------|-----------------|-----------------|-----------------|
| 1               | $g_x = 0.000$   | $g_x = 0.000$   | $g_x = 0.000$   |
|                 | $g_y = 0.000$   | $g_y = 0.000$   | $g_y = 0.003$   |
|                 | $g_z = 17.908$  | $g_z = 17.908$  | $g_z = 17.914$  |
| 2               | $g_x = 0.000$   | $g_x = 0.000$   | $g_x = 0.534$   |
|                 | $g_y = 0.000$   | $g_y = 0.000$   | $g_y = 1.496$   |
|                 | $g_z = 14.623$  | $g_z = 14.625$  | $g_z = 14.622$  |
| 3               | $g_x = 0.000$   | $g_x = 0.000$   | $g_x = 0.633$   |
|                 | $g_y = 0.000$   | $g_y = 0.000$   | $g_y = 1.868$   |
|                 | $g_z = 11.222$  | $g_z = 11.223$  | $g_z = 11.181$  |
| 4               | $g_x = 0.000$   | $g_x = 0.000$   | $g_x = 0.123$   |
|                 | $g_y = 0.000$   | $g_y = 0.000$   | $g_y = 3.139$   |
|                 | $g_z = 7.419$   | $g_z = 7.395$   | $g_z = 7.180$   |
| 5               | $g_x = 0.000$   | $g_x = 0.000$   | $g_x = 9.095$   |
|                 | $g_y = 0.000$   | $g_y = 0.000$   | $g_y = 6.628$   |
|                 | $g_z = 4.282$   | $g_z = 4.236$   | $g_z = 4.177$   |
| 6               | $g_x = 0.000$   | $g_x = 0.000$   | $g_x = 1.818$   |
|                 | $g_y = 0.000$   | $g_y = 0.000$   | $g_y = 2.632$   |
|                 | $g_z = 17.195$  | $g_z = 17.228$  | $g_z = 17.271$  |



**Table S4:** The  $g$ -tensors for the lowest Kramers doublets of Dy(III) ions in  $\text{Cu}_3\text{Dy}_3(\mathbf{3})$ :

| Kramer Doublets | Dy1            | Dy2            | Dy3            |
|-----------------|----------------|----------------|----------------|
| 1               | $g_x = 0.000$  | $g_x = 0.000$  | $g_x = 0.000$  |
|                 | $g_y = 0.002$  | $g_y = 0.002$  | $g_y = 0.002$  |
|                 | $g_z = 19.619$ | $g_z = 19.623$ | $g_z = 19.654$ |
| 2               | $g_x = 0.244$  | $g_x = 0.225$  | $g_x = 0.227$  |
|                 | $g_y = 0.570$  | $g_y = 0.521$  | $g_y = 0.507$  |
|                 | $g_z = 16.959$ | $g_z = 17.016$ | $g_z = 17.079$ |
| 3               | $g_x = 1.502$  | $g_x = 1.444$  | $g_x = 1.438$  |
|                 | $g_y = 1.655$  | $g_y = 1.622$  | $g_y = 1.583$  |
|                 | $g_z = 13.523$ | $g_z = 13.595$ | $g_z = 13.617$ |
| 4               | $g_x = 0.711$  | $g_x = 0.645$  | $g_x = 0.521$  |
|                 | $g_y = 2.635$  | $g_y = 2.590$  | $g_y = 2.646$  |
|                 | $g_z = 11.022$ | $g_z = 11.087$ | $g_z = 11.207$ |
| 5               | $g_x = 1.031$  | $g_x = 1.174$  | $g_x = 1.407$  |
|                 | $g_y = 3.512$  | $g_y = 3.866$  | $g_y = 4.351$  |
|                 | $g_z = 10.294$ | $g_z = 10.001$ | $g_z = 9.899$  |
| 6               | $g_x = 3.122$  | $g_x = 3.037$  | $g_x = 3.016$  |
|                 | $g_y = 4.336$  | $g_y = 4.163$  | $g_y = 3.974$  |
|                 | $g_z = 14.189$ | $g_z = 14.595$ | $g_z = 14.958$ |
| 7               | $g_x = 1.057$  | $g_x = 1.077$  | $g_x = 0.971$  |
|                 | $g_y = 1.171$  | $g_y = 1.202$  | $g_y = 1.108$  |
|                 | $g_z = 13.954$ | $g_z = 13.897$ | $g_z = 13.947$ |
| 8               | $g_x = 0.194$  | $g_x = 0.201$  | $g_x = 0.198$  |
|                 | $g_y = 0.574$  | $g_y = 0.593$  | $g_y = 0.601$  |
|                 | $g_z = 17.605$ | $g_z = 17.58$  | $g_z = 17.553$ |

**Table S5:** The  $g$ -tensors for the lowest Ising doublets of Tb(III) ions in  $\text{Cu}_3\text{Tb}_3(\mathbf{4})$ :

| Kramer Doublets | Tb <sub>1</sub> | Tb <sub>2</sub> | Tb <sub>3</sub> |
|-----------------|-----------------|-----------------|-----------------|
| 1               | $g_x = 0.000$   | $g_x = 0.000$   | $g_x = 0.000$   |
|                 | $g_y = 0.000$   | $g_y = 0.000$   | $g_y = 0.003$   |
|                 | $g_z = 17.891$  | $g_z = 17.923$  | $g_z = 17.927$  |
| 2               | $g_x = 0.000$   | $g_x = 0.000$   | $g_x = 0.000$   |
|                 | $g_y = 0.000$   | $g_y = 0.000$   | $g_y = 0.000$   |
|                 | $g_z = 14.615$  | $g_z = 14.627$  | $g_z = 14.636$  |
| 3               | $g_x = 0.000$   | $g_x = 0.000$   | $g_x = 0.000$   |
|                 | $g_y = 0.000$   | $g_y = 0.000$   | $g_y = 0.000$   |
|                 | $g_z = 11.224$  | $g_z = 11.170$  | $g_z = 11.216$  |
| 4               | $g_x = 0.000$   | $g_x = 0.000$   | $g_x = 0.000$   |
|                 | $g_y = 0.000$   | $g_y = 0.000$   | $g_y = 0.000$   |
|                 | $g_z = 7.483$   | $g_z = 7.279$   | $g_z = 7.418$   |
| 5               | $g_x = 0.000$   | $g_x = 0.000$   | $g_x = 0.000$   |
|                 | $g_y = 0.000$   | $g_y = 0.000$   | $g_y = 0.000$   |
|                 | $g_z = 4.534$   | $g_z = 4.333$   | $g_z = 4.488$   |
| 6               | $g_x = 0.000$   | $g_x = 0.000$   | $g_x = 0.000$   |
|                 | $g_y = 0.000$   | $g_y = 0.000$   | $g_y = 0.000$   |
|                 | $g_z = 15.620$  | $g_z = 15.953$  | $g_z = 15.735$  |

**Table S6:** The  $g$ -tensors for the lowest Kramers doublets of Dy(III) ions in Ni<sub>3</sub>Dy<sub>3</sub>(**5**):

| Kramer Doublets | Dy1            | Dy2            | Dy3            |
|-----------------|----------------|----------------|----------------|
| 1               | $g_x = 0.005$  | $g_x = 0.005$  | $g_x = 0.005$  |
|                 | $g_y = 0.006$  | $g_y = 0.006$  | $g_y = 0.005$  |
|                 | $g_z = 19.451$ | $g_z = 19.516$ | $g_z = 19.478$ |
| 2               | $g_x = 0.336$  | $g_x = 0.378$  | $g_x = 0.342$  |
|                 | $g_y = 0.633$  | $g_y = 0.749$  | $g_y = 0.681$  |
|                 | $g_z = 17.428$ | $g_z = 17.133$ | $g_z = 17.217$ |
| 3               | $g_x = 2.275$  | $g_x = 2.524$  | $g_x = 2.183$  |
|                 | $g_y = 4.593$  | $g_y = 5.401$  | $g_y = 4.231$  |
|                 | $g_z = 11.295$ | $g_z = 10.588$ | $g_z = 11.465$ |
| 4               | $g_x = 0.552$  | $g_x = 1.009$  | $g_x = 0.285$  |
|                 | $g_y = 5.121$  | $g_y = 5.393$  | $g_y = 5.051$  |
|                 | $g_z = 10.998$ | $g_z = 10.137$ | $g_z = 11.067$ |
| 5               | $g_x = 8.461$  | $g_x = 3.102$  | $g_x = 8.965$  |
|                 | $g_y = 6.428$  | $g_y = 5.723$  | $g_y = 6.011$  |
|                 | $g_z = 2.171$  | $g_z = 9.244$  | $g_z = 2.382$  |
| 6               | $g_x = 1.683$  | $g_x = 1.048$  | $g_x = 1.191$  |
|                 | $g_y = 2.388$  | $g_y = 1.582$  | $g_y = 2.112$  |
|                 | $g_z = 15.753$ | $g_z = 15.842$ | $g_z = 15.347$ |
| 7               | $g_x = 1.102$  | $g_x = 1.044$  | $g_x = 1.049$  |
|                 | $g_y = 1.248$  | $g_y = 1.229$  | $g_y = 1.278$  |
|                 | $g_z = 16.908$ | $g_z = 17.032$ | $g_z = 16.981$ |
| 8               | $g_x = 0.026$  | $g_x = 0.026$  | $g_x = 0.028$  |
|                 | $g_y = 0.056$  | $g_y = 0.054$  | $g_y = 0.059$  |
|                 | $g_z = 19.631$ | $g_z = 19.693$ | $g_z = 19.678$ |

**Table S7:** The  $g$ -tensors for the lowest Ising doublets of Tb(III) ions in Ni<sub>3</sub>Tb<sub>3</sub>(**6**):

| Kramer Doublets | Tb1            | Tb2            | Tb3            |
|-----------------|----------------|----------------|----------------|
| 1               | $g_x = 0.000$  | $g_x = 0.000$  | $g_x = 0.000$  |
|                 | $g_y = 0.000$  | $g_y = 0.000$  | $g_y = 0.000$  |
|                 | $g_z = 17.434$ | $g_z = 17.421$ | $g_z = 17.446$ |
| 2               | $g_x = 0.000$  | $g_x = 0.000$  | $g_x = 0.000$  |
|                 | $g_y = 0.000$  | $g_y = 0.000$  | $g_y = 0.000$  |
|                 | $g_z = 14.313$ | $g_z = 14.227$ | $g_z = 14.338$ |
| 3               | $g_x = 0.000$  | $g_x = 0.000$  | $g_x = 0.000$  |
|                 | $g_y = 0.000$  | $g_y = 0.000$  | $g_y = 0.000$  |
|                 | $g_z = 10.921$ | $g_z = 11.006$ | $g_z = 11.021$ |
| 4               | $g_x = 0.000$  | $g_x = 0.000$  | $g_x = 0.000$  |
|                 | $g_y = 0.000$  | $g_y = 0.000$  | $g_y = 0.000$  |
|                 | $g_z = 5.431$  | $g_z = 5.386$  | $g_z = 5.437$  |
| 5               | $g_x = 0.000$  | $g_x = 0.000$  | $g_x = 0.000$  |
|                 | $g_y = 0.000$  | $g_y = 0.000$  | $g_y = 0.000$  |
|                 | $g_z = 4.731$  | $g_z = 4.333$  | $g_z = 4.712$  |

**Table S8:** RASSI energies of the lowest spin-orbit states (in  $\text{cm}^{-1}$ ) on each  $\text{Dy}^{\text{III}}$  center.

| {Zn <sub>3</sub> Dy <sub>3</sub> }(1) |           |           | {Cu <sub>3</sub> Dy <sub>3</sub> }(3) |           |           | {Ni <sub>3</sub> Dy <sub>3</sub> }(5) |           |           |
|---------------------------------------|-----------|-----------|---------------------------------------|-----------|-----------|---------------------------------------|-----------|-----------|
| Dy1                                   | Dy1       | Dy1       | Dy1                                   | Dy1       | Dy3       | Dy1                                   | Dy1       | Dy3       |
| 0.000                                 | 0.000     | 0.000     | 0.000                                 | 0.000     | 0.000     | 0.000                                 | 0.000     | 0.000     |
| 128.509                               | 149.195   | 148.812   | 148.774                               | 128.450   | 127.821   | 141.603                               | 145.025   | 145.392   |
| 169.742                               | 200.109   | 201.826   | 203.271                               | 169.652   | 168.883   | 185.910                               | 188.064   | 187.017   |
| 235.522                               | 251.860   | 254.626   | 257.904                               | 237.262   | 237.345   | 224.993                               | 226.093   | 227.167   |
| 351.165                               | 349.755   | 354.425   | 356.183                               | 354.812   | 352.725   | 295.325                               | 296.231   | 296.397   |
| 408.716                               | 376.045   | 381.279   | 386.156                               | 413.354   | 411.997   | 325.705                               | 328.843   | 324.960   |
| 485.036                               | 493.507   | 497.126   | 501.852                               | 488.001   | 489.138   | 374.145                               | 376.904   | 376.492   |
| 579.086                               | 612.036   | 615.632   | 617.599                               | 582.197   | 581.914   | 530.126                               | 539.580   | 528.038   |
| 3586.161                              | 3599.096  | 3598.785  | 3598.768                              | 3585.723  | 3585.529  | 3608.219                              | 3609.524  | 3609.682  |
| 3658.744                              | 3667.304  | 3669.310  | 3670.097                              | 3659.933  | 3658.671  | 3691.295                              | 3691.178  | 3690.710  |
| 3787.460                              | 3787.383  | 3790.310  | 3791.964                              | 3789.875  | 3788.370  | 3742.226                              | 3744.140  | 3744.916  |
| 3864.857                              | 3865.867  | 3869.287  | 3872.362                              | 3867.284  | 3866.751  | 3782.482                              | 3784.958  | 3782.898  |
| 3913.218                              | 3938.402  | 3941.802  | 3944.053                              | 3915.216  | 3914.622  | 3826.137                              | 3829.017  | 3826.079  |
| 3953.415                              | 3971.749  | 3975.213  | 3977.925                              | 3956.227  | 3956.242  | 3880.971                              | 3886.351  | 3875.509  |
| 3989.207                              | 3989.671  | 3993.512  | 6150.351                              | 3993.131  | 3992.473  | 3977.265                              | 3983.512  | 3947.619  |
| 6136.698                              | 6149.390  | 6149.738  | 6221.057                              | 6136.600  | 6136.480  | 6152.830                              | 6155.628  | 6153.557  |
| 6214.008                              | 6217.262  | 6219.833  | 6342.834                              | 6216.065  | 6214.574  | 6218.475                              | 6218.363  | 6216.212  |
| 6339.054                              | 6337.361  | 6340.111  | 6431.673                              | 6341.070  | 6340.856  | 6269.227                              | 6271.429  | 6268.993  |
| 6409.160                              | 6425.308  | 6428.690  | 6462.770                              | 6410.907  | 6410.812  | 6334.386                              | 6336.734  | 6331.223  |
| 6430.808                              | 6458.351  | 6460.765  | 6494.493                              | 6433.063  | 6432.429  | 6384.139                              | 6388.603  | 6373.641  |
| 6489.253                              | 6487.427  | 6491.882  | 8134.152                              | 6493.393  | 6492.012  | 6455.692                              | 6461.624  | 6426.398  |
| 8119.746                              | 8132.311  | 8133.205  | 8194.394                              | 8120.098  | 8119.826  | 8123.758                              | 8126.962  | 8122.459  |
| 8189.680                              | 8189.263  | 8192.129  | 8325.522                              | 8191.948  | 8191.137  | 8173.084                              | 8173.749  | 8169.573  |
| 8317.725                              | 8318.752  | 8321.654  | 8395.853                              | 8319.417  | 8320.178  | 8246.182                              | 8248.526  | 8242.650  |
| 8360.753                              | 8392.083  | 8394.280  | 8445.558                              | 8362.491  | 8361.757  | 8321.290                              | 8325.194  | 8314.337  |
| 8437.614                              | 8439.502  | 8443.827  | 9665.641                              | 8441.510  | 8439.517  | 8394.722                              | 8399.645  | 8376.908  |
| 9652.595                              | 9663.413  | 9664.905  | 9749.438                              | 9653.562  | 9652.646  | 9660.589                              | 9663.848  | 9659.158  |
| 9748.753                              | 9742.280  | 9744.918  | 9895.167                              | 9750.438  | 9751.858  | 9707.019                              | 9707.874  | 9703.212  |
| 9860.703                              | 9890.682  | 9892.644  | 9980.727                              | 9861.803  | 9861.898  | 9806.863                              | 9811.081  | 9803.611  |
| 9973.881                              | 9974.711  | 9978.932  | 10135.773                             | 9977.698  | 9975.891  | 9933.586                              | 9938.290  | 9924.350  |
| 10111.711                             | 10132.763 | 10134.890 | 10143.100                             | 10113.067 | 10111.730 | 10086.745                             | 10087.149 | 10086.907 |
| 10139.955                             | 10138.921 | 10141.753 | 10186.538                             | 10142.522 | 10141.347 | 10109.395                             | 10112.403 | 10109.919 |
| 10172.656                             | 10182.215 | 10185.025 | 10200.220                             | 10174.670 | 10173.668 | 10131.675                             | 10134.124 | 10132.240 |
| 10185.899                             | 10196.067 | 10198.625 | 10239.970                             | 10188.032 | 10186.701 | 10156.798                             | 10159.363 | 10157.502 |
| 10222.797                             | 10234.926 | 10238.346 | 10318.774                             | 10225.753 | 10224.093 | 10194.196                             | 10198.312 | 10194.549 |
| 10301.809                             | 10312.613 | 10316.491 | 10814.458                             | 10305.131 | 10304.245 | 10222.733                             | 10226.846 | 10219.706 |
| 10803.584                             | 10812.714 | 10813.993 | 11013.993                             | 10804.329 | 10803.349 | 10815.672                             | 10816.504 | 10812.215 |
| 11003.832                             | 11006.917 | 11010.429 | 11169.651                             | 11006.376 | 11006.007 | 10935.738                             | 10938.573 | 10936.641 |
| 11147.606                             | 11162.795 | 11166.261 | 11557.754                             | 11150.525 | 11151.064 | 11091.507                             | 11098.374 | 11091.123 |
| 11546.229                             | 11552.990 | 11555.675 | 11621.684                             | 11548.249 | 11547.548 | 11521.849                             | 11523.888 | 11522.063 |
| 11602.107                             | 11617.883 | 11620.499 | 11628.682                             | 11604.207 | 11602.768 | 11554.498                             | 11557.452 | 11555.319 |
| 11616.313                             | 11625.168 | 11628.316 | 11654.381                             | 11619.064 | 11616.909 | 11582.061                             | 11585.245 | 11582.429 |
| 11641.124                             | 11649.251 | 11652.420 | 11681.158                             | 11643.764 | 11642.731 | 11590.107                             | 11593.481 | 11590.197 |
| 11664.025                             | 11676.070 | 11679.525 | 13512.413                             | 11666.959 | 11665.494 | 11617.733                             | 11620.328 | 11617.338 |
| 13497.965                             | 13507.554 | 13510.319 | 13538.658                             | 13500.028 | 13499.409 | 13461.513                             | 13464.364 | 13462.027 |
| 13524.672                             | 13533.866 | 13536.701 | 13577.954                             | 13526.853 | 13525.920 | 13501.557                             | 13504.637 | 13502.631 |
| 13561.445                             | 13573.051 | 13576.091 | 13608.887                             | 13564.068 | 13562.930 | 13519.000                             | 13522.319 | 13520.008 |
| 13595.235                             | 13604.764 | 13607.818 | 14981.779                             | 13597.783 | 13596.336 | 13541.426                             | 13544.366 | 13541.507 |
| 14967.045                             | 14977.049 | 14979.906 | 15007.996                             | 14969.231 | 14968.252 | 14935.145                             | 14937.907 | 14936.370 |
| 14992.219                             | 15003.272 | 15006.233 | 15030.517                             | 14994.674 | 14993.500 | 14953.035                             | 14955.977 | 14954.049 |
| 15017.203                             | 15025.885 | 15028.799 | 15867.044                             | 15019.554 | 15018.720 | 14973.124                             | 14976.715 | 14973.642 |
| 15852.348                             | 15862.324 | 15865.225 | 15874.882                             | 15854.616 | 15853.670 | 15810.901                             | 15813.823 | 15811.852 |
| 15860.460                             | 15870.170 | 15873.085 | 16404.937                             | 15862.856 | 15861.887 | 15823.563                             | 15826.996 | 15824.424 |
| 16390.166                             | 16400.029 | 16403.034 | 24650.882                             | 16392.586 | 16391.633 | 16349.666                             | 16352.954 | 16350.570 |



**Table S9:** RASSI energies of the lowest spin-orbit states (in  $\text{cm}^{-1}$ ) on each  $\text{Tb}^{\text{III}}$  center.

| {Zn <sub>3</sub> Tb <sub>3</sub> }(2) |           |           | {Cu <sub>3</sub> Tb <sub>3</sub> }(4) |           |           | {Ni <sub>3</sub> Tb <sub>3</sub> }(6) |           |           |
|---------------------------------------|-----------|-----------|---------------------------------------|-----------|-----------|---------------------------------------|-----------|-----------|
| Tb1                                   | Tb2       | Tb3       | Tb3                                   | Tb2       | Tb3       | Tb1                                   | Tb2       | Tb3       |
| 0.000                                 | 0.000     | 0.000     | 0.000                                 | 0.000     | 0.000     | 0.000                                 | 0.000     | 0.000     |
| 0.010                                 | 0.026     | 0.031     | 0.026                                 | 0.009     | 0.016     | 0.680                                 | 0.661     | 0.632     |
| 178.483                               | 173.455   | 171.848   | 172.334                               | 177.669   | 177.128   | 84.266                                | 82.894    | 83.080    |
| 179.330                               | 173.743   | 172.105   | 172.585                               | 178.470   | 177.928   | 90.590                                | 88.858    | 88.825    |
| 324.282                               | 319.761   | 317.439   | 318.306                               | 323.080   | 322.117   | 158.459                               | 159.017   | 158.678   |
| 337.008                               | 331.952   | 330.411   | 330.489                               | 335.761   | 336.000   | 180.338                               | 180.303   | 179.224   |
| 427.279                               | 425.457   | 422.269   | 424.870                               | 427.271   | 425.144   | 239.880                               | 240.246   | 239.069   |
| 432.183                               | 439.653   | 440.017   | 438.489                               | 430.741   | 431.605   | 289.226                               | 289.097   | 286.582   |
| 472.661                               | 478.055   | 475.535   | 477.263                               | 472.103   | 469.334   | 315.705                               | 316.089   | 313.678   |
| 498.794                               | 538.330   | 540.273   | 539.682                               | 498.779   | 498.988   | 366.838                               | 364.849   | 363.639   |
| 509.521                               | 548.862   | 548.610   | 549.530                               | 509.089   | 507.735   | 372.988                               | 371.037   | 369.946   |
| 601.273                               | 576.701   | 579.774   | 578.333                               | 603.536   | 604.500   | 456.187                               | 456.917   | 450.245   |
| 603.780                               | 582.047   | 584.213   | 583.389                               | 605.898   | 606.932   | 456.913                               | 457.812   | 450.994   |
| 2287.916                              | 2276.573  | 2252.543  | 2253.116                              | 2286.827  | 2264.463  | 2134.672                              | 2134.409  | 2132.533  |
| 2293.581                              | 2282.589  | 2258.272  | 2259.022                              | 2292.465  | 2269.760  | 2135.839                              | 2136.950  | 2134.336  |
| 2324.208                              | 2337.087  | 2313.792  | 2315.503                              | 2324.542  | 2300.772  | 2224.001                              | 2223.597  | 2223.088  |
| 2358.250                              | 2372.231  | 2350.220  | 2350.351                              | 2358.950  | 2336.089  | 2242.987                              | 2243.876  | 2242.598  |
| 2366.216                              | 2377.859  | 2356.343  | 2355.196                              | 2364.411  | 2343.511  | 2259.572                              | 2260.127  | 2258.178  |
| 2422.688                              | 2432.406  | 2408.258  | 2410.360                              | 2421.858  | 2398.693  | 2281.308                              | 2280.862  | 2280.081  |
| 2467.810                              | 2464.007  | 2443.343  | 2443.595                              | 2469.972  | 2447.391  | 2322.811                              | 2320.561  | 2320.243  |
| 2486.064                              | 2471.280  | 2448.626  | 2450.022                              | 2486.331  | 2463.360  | 2339.328                              | 2339.720  | 2336.982  |
| 2525.263                              | 2506.705  | 2482.499  | 2484.446                              | 2525.042  | 2500.825  | 2369.166                              | 2367.825  | 2366.931  |
| 2609.385                              | 2621.521  | 2600.454  | 2598.588                              | 2608.823  | 2588.036  | 2445.164                              | 2445.910  | 2440.725  |
| 2645.800                              | 2657.286  | 2637.619  | 2634.412                              | 2645.603  | 2625.417  | 2460.868                              | 2462.517  | 2456.911  |
| 3640.164                              | 3636.464  | 3628.126  | 3630.471                              | 3641.969  | 3632.639  | 3535.758                              | 3535.722  | 3535.040  |
| 3686.694                              | 3691.050  | 3683.498  | 3683.119                              | 3685.033  | 3678.878  | 3573.774                              | 3572.817  | 3571.612  |
| 3735.742                              | 3729.099  | 3717.274  | 3722.546                              | 3736.344  | 3724.406  | 3591.633                              | 3589.161  | 3588.339  |
| 3749.722                              | 3753.239  | 3742.986  | 3745.172                              | 3748.427  | 3739.279  | 3620.208                              | 3619.555  | 3618.079  |
| 3790.418                              | 3799.108  | 3790.323  | 3788.974                              | 3788.350  | 3780.930  | 3669.095                              | 3669.531  | 3668.369  |
| 3813.484                              | 3805.653  | 3792.991  | 3797.580                              | 3811.741  | 3801.159  | 3690.774                              | 3694.518  | 3689.589  |
| 3894.920                              | 3906.548  | 3904.830  | 3900.139                              | 3896.974  | 3892.141  | 3718.992                              | 3719.574  | 3716.277  |
| 3902.771                              | 3911.714  | 3908.423  | 3904.351                              | 3904.631  | 3899.062  | 3795.792                              | 3793.309  | 3792.144  |
| 3970.758                              | 3976.768  | 3973.914  | 3968.606                              | 3971.008  | 3966.707  | 3817.847                              | 3816.681  | 3814.218  |
| 4717.229                              | 4716.822  | 4700.225  | 4701.673                              | 4716.723  | 4700.403  | 4612.682                              | 4613.041  | 4610.745  |
| 4754.859                              | 4755.845  | 4740.468  | 4740.514                              | 4754.053  | 4739.351  | 4650.351                              | 4648.574  | 4648.430  |
| 4802.206                              | 4809.164  | 4795.549  | 4794.238                              | 4802.469  | 4788.107  | 4672.115                              | 4669.508  | 4669.606  |
| 4859.593                              | 4857.493  | 4843.964  | 4842.336                              | 4859.647  | 4845.263  | 4706.208                              | 4706.738  | 4704.703  |
| 4901.602                              | 4905.385  | 4893.692  | 4890.921                              | 4902.439  | 4889.565  | 4729.884                              | 4729.858  | 4727.120  |
| 4930.317                              | 4936.857  | 4923.038  | 4921.614                              | 4931.177  | 4915.980  | 4758.309                              | 4758.198  | 4755.776  |
| 4934.662                              | 4942.909  | 4928.436  | 4927.711                              | 4935.259  | 4919.733  | 4764.489                              | 4763.142  | 4760.909  |
| 5380.837                              | 5385.312  | 5385.542  | 5385.612                              | 5381.325  | 5380.523  | 5348.982                              | 5348.470  | 5348.063  |
| 5553.628                              | 5547.386  | 5544.299  | 5544.203                              | 5552.875  | 5550.353  | 5384.311                              | 5381.387  | 5380.689  |
| 5590.549                              | 5596.976  | 5597.446  | 5593.725                              | 5590.256  | 5590.848  | 5466.105                              | 5469.063  | 5463.354  |
| 5685.680                              | 5689.678  | 5686.146  | 5686.655                              | 5685.752  | 5681.552  | 5510.445                              | 5509.771  | 5508.366  |
| 5741.209                              | 5751.193  | 5751.790  | 5750.352                              | 5742.854  | 5741.635  | 5565.359                              | 5567.160  | 5562.699  |
| 5896.730                              | 5893.489  | 5908.633  | 5907.495                              | 5896.138  | 5911.446  | 5833.299                              | 5833.285  | 5830.764  |
| 6160.261                              | 6184.186  | 6199.769  | 6201.214                              | 6160.705  | 6176.059  | 5976.804                              | 5977.342  | 5975.256  |
| 6213.207                              | 6198.405  | 6217.171  | 6214.057                              | 6214.360  | 6230.864  | 6095.354                              | 6094.391  | 6090.517  |
| 6354.012                              | 6356.343  | 6384.574  | 6383.727                              | 6354.663  | 6381.840  | 6234.342                              | 6233.970  | 6231.018  |
| 23662.565                             | 23663.343 | 24434.671 | 24435.289                             | 23662.425 | 24434.308 | 24340.817                             | 24339.977 | 24338.560 |
| 23662.952                             | 23663.630 | 24434.918 | 24435.509                             | 23662.761 | 24434.774 | 24340.970                             | 24340.147 | 24338.719 |
| 23720.947                             | 23721.477 | 24500.962 | 24502.005                             | 23721.281 | 24497.320 | 24391.233                             | 24390.532 | 24389.080 |
| 23724.279                             | 23726.360 | 24504.636 | 24505.694                             | 23724.480 | 24502.517 | 24394.830                             | 24394.371 | 24392.542 |
| 23779.104                             | 23777.781 | 24546.363 | 24548.062                             | 23778.876 | 24546.973 | 24410.974                             | 24409.785 | 24408.703 |

|           |           |           |           |           |           |           |           |           |
|-----------|-----------|-----------|-----------|-----------|-----------|-----------|-----------|-----------|
| 23791.754 | 23794.054 | 24561.283 | 24562.524 | 23792.088 | 24558.817 | 24428.607 | 24426.920 | 24426.294 |
| 23819.056 | 23816.035 | 24581.388 | 24583.413 | 23819.410 | 24586.960 | 24432.597 | 24431.069 | 24430.161 |
| 23821.668 | 23830.879 | 24613.757 | 24614.234 | 23820.717 | 24604.316 | 24486.354 | 24485.413 | 24483.332 |
| 23831.048 | 23836.546 | 24618.114 | 24618.873 | 23830.600 | 24612.426 | 24487.754 | 24486.852 | 24484.764 |
| 29703.874 | 29703.729 | 29990.698 | 29992.186 | 29703.966 | 29990.457 | 29878.296 | 29877.570 | 29876.026 |
| 29707.187 | 29706.211 | 29994.264 | 29995.829 | 29707.155 | 29993.896 | 29879.964 | 29879.268 | 29877.700 |
| 29720.445 | 29723.508 | 30002.196 | 30003.904 | 29720.378 | 30002.969 | 29884.449 | 29883.261 | 29882.110 |
| 29723.623 | 29724.597 | 30011.716 | 30013.358 | 29723.162 | 30010.001 | 29891.384 | 29890.636 | 29889.038 |
| 29730.199 | 29732.082 | 30014.888 | 30016.438 | 29730.385 | 30011.565 | 29893.110 | 29892.728 | 29890.822 |
| 29731.356 | 29733.876 | 30021.385 | 30022.849 | 29731.271 | 30018.449 | 29901.641 | 29900.799 | 29899.376 |
| 29737.901 | 29737.084 | 30026.807 | 30028.007 | 29737.817 | 30026.363 | 29909.489 | 29908.515 | 29907.118 |
| 30365.482 | 30373.760 | 31330.256 | 31335.187 | 30366.561 | 31322.232 | 31226.367 | 31224.605 | 31224.129 |
| 30366.615 | 30375.045 | 31331.366 | 31336.203 | 30367.814 | 31323.254 | 31226.628 | 31224.951 | 31224.381 |
| 30376.646 | 30385.246 | 31342.097 | 31346.387 | 30376.788 | 31332.482 | 31262.447 | 31256.944 | 31261.091 |
| 30377.936 | 30386.497 | 31343.381 | 31347.641 | 30378.092 | 31333.718 | 31264.819 | 31259.907 | 31263.403 |
| 30435.560 | 30429.752 | 31387.994 | 31393.865 | 30431.279 | 31394.438 | 31274.618 | 31269.455 | 31273.722 |
| 30437.424 | 30431.760 | 31388.368 | 31394.709 | 30433.419 | 31395.001 | 31276.846 | 31274.956 | 31276.181 |
| 30457.950 | 30461.478 | 31426.849 | 31425.027 | 30459.518 | 31425.439 | 31293.793 | 31287.443 | 31291.988 |
| 30461.642 | 30464.075 | 31429.694 | 31428.261 | 30463.506 | 31429.482 | 31297.993 | 31295.552 | 31296.416 |
| 30504.053 | 30506.769 | 31470.492 | 31469.261 | 30504.236 | 31466.997 | 31322.405 | 31322.006 | 31319.619 |
| 30518.744 | 30518.329 | 31477.523 | 31477.927 | 30520.425 | 31481.644 | 31324.739 | 31324.833 | 31322.158 |
| 30528.560 | 30527.010 | 31487.779 | 31487.887 | 30528.204 | 31483.608 | 31348.212 | 31344.316 | 31345.389 |
| 30535.392 | 30535.635 | 31491.580 | 31491.568 | 30536.608 | 31494.714 | 31359.652 | 31356.850 | 31356.446 |
| 30536.864 | 30543.284 | 31503.439 | 31502.943 | 30538.430 | 31497.996 | 31379.213 | 31375.228 | 31375.511 |
| 30546.193 | 30546.589 | 31506.200 | 31507.182 | 30543.790 | 31500.522 | 31415.133 | 31414.906 | 31412.790 |
| 30551.586 | 30550.699 | 31509.600 | 31508.604 | 30550.296 | 31506.161 | 31420.685 | 31419.911 | 31418.170 |
| 30568.058 | 30568.724 | 31535.013 | 31535.285 | 30568.356 | 31533.116 | 31456.356 | 31456.701 | 31452.681 |
| 30569.969 | 30569.945 | 31537.657 | 31537.414 | 30570.436 | 31536.938 | 31457.436 | 31457.515 | 31453.780 |
| 30646.651 | 30647.061 | 31611.398 | 31612.039 | 30646.921 | 31610.157 | 31488.936 | 31490.039 | 31486.668 |
| 30647.389 | 30647.677 | 31613.329 | 31614.013 | 30647.622 | 31612.057 | 31489.066 | 31490.155 | 31486.806 |
| 30693.483 | 30692.142 | 31668.176 | 31665.844 | 30692.869 | 31667.834 | 31499.510 | 31508.726 | 31496.722 |
| 30693.648 | 30692.295 | 31668.784 | 31666.493 | 30693.027 | 31668.424 | 31499.807 | 31508.941 | 32110.850 |
| .....     | .....     | .....     | .....     | .....     | .....     | .....     | .....     | .....     |

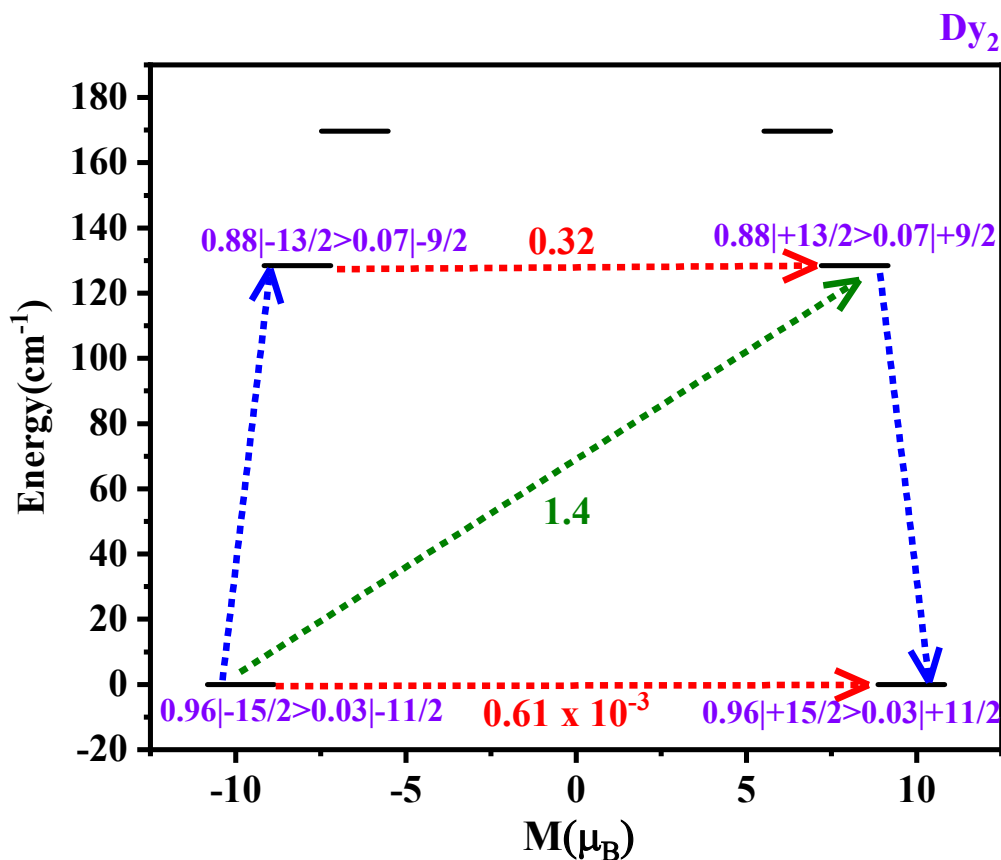



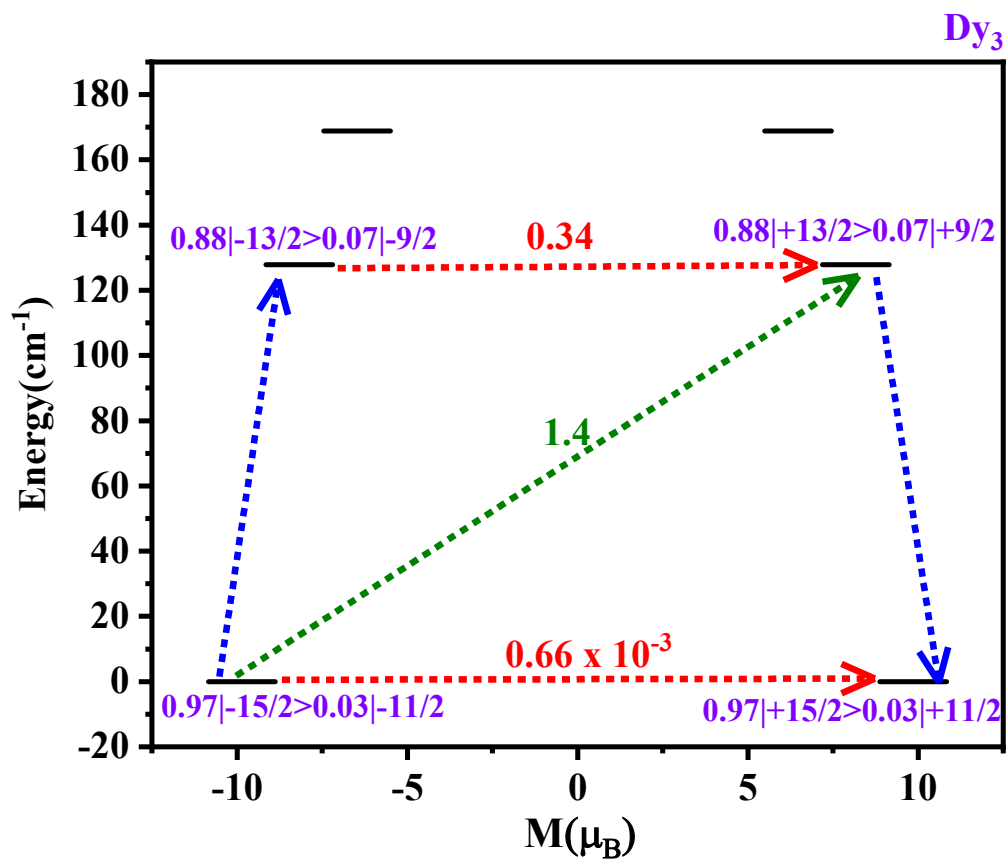

**Figure S2:** Magnetic relaxation mechanism of Dy2 and Dy3 centers in **1**.

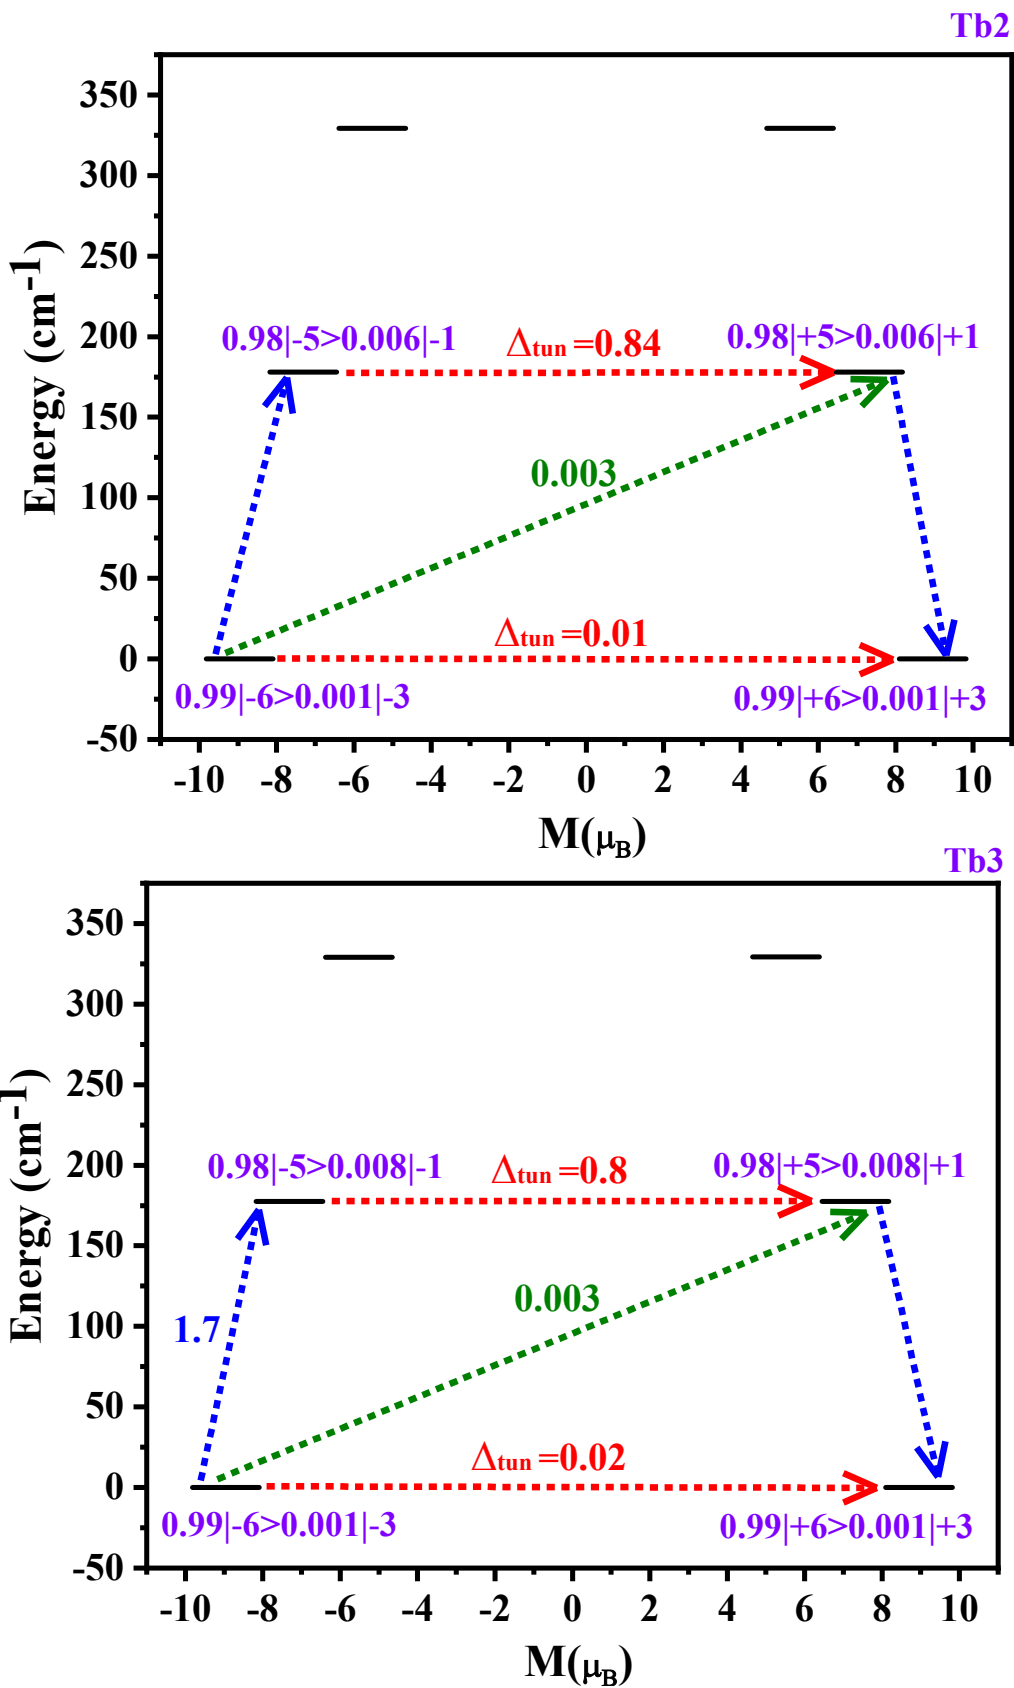

Figure S3: Magnetic relaxation mechanism of Tb2 and Tb3 centers in 2.

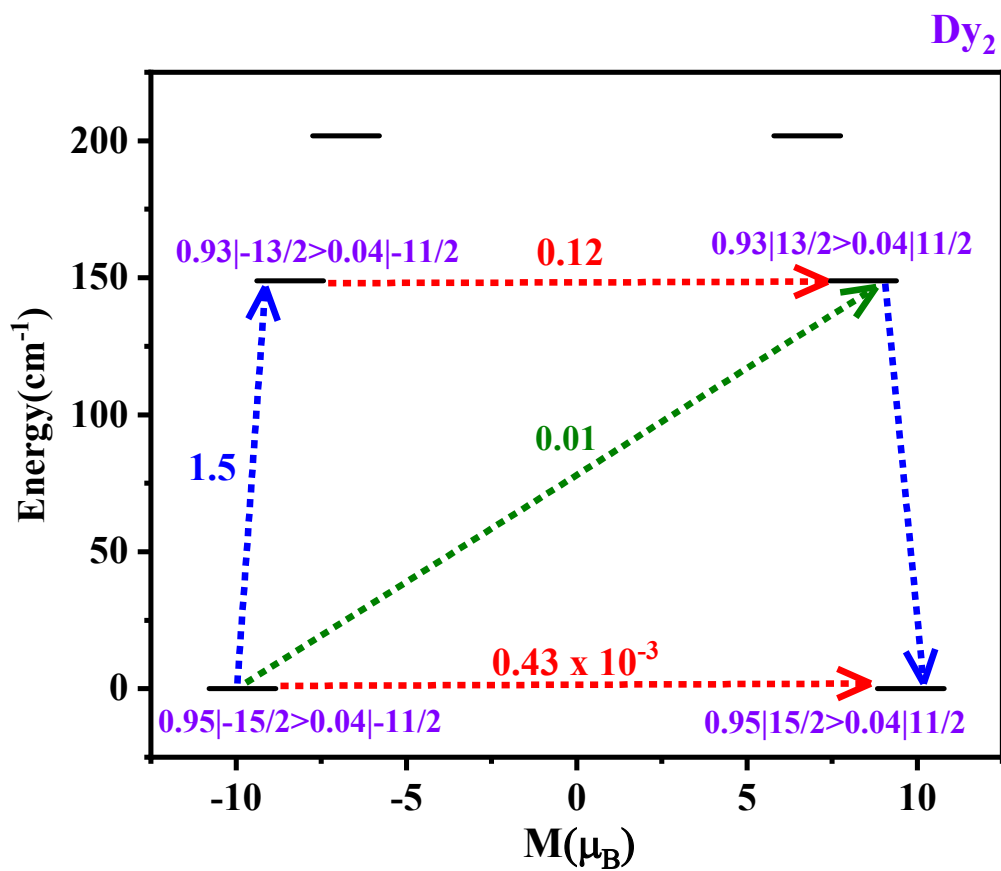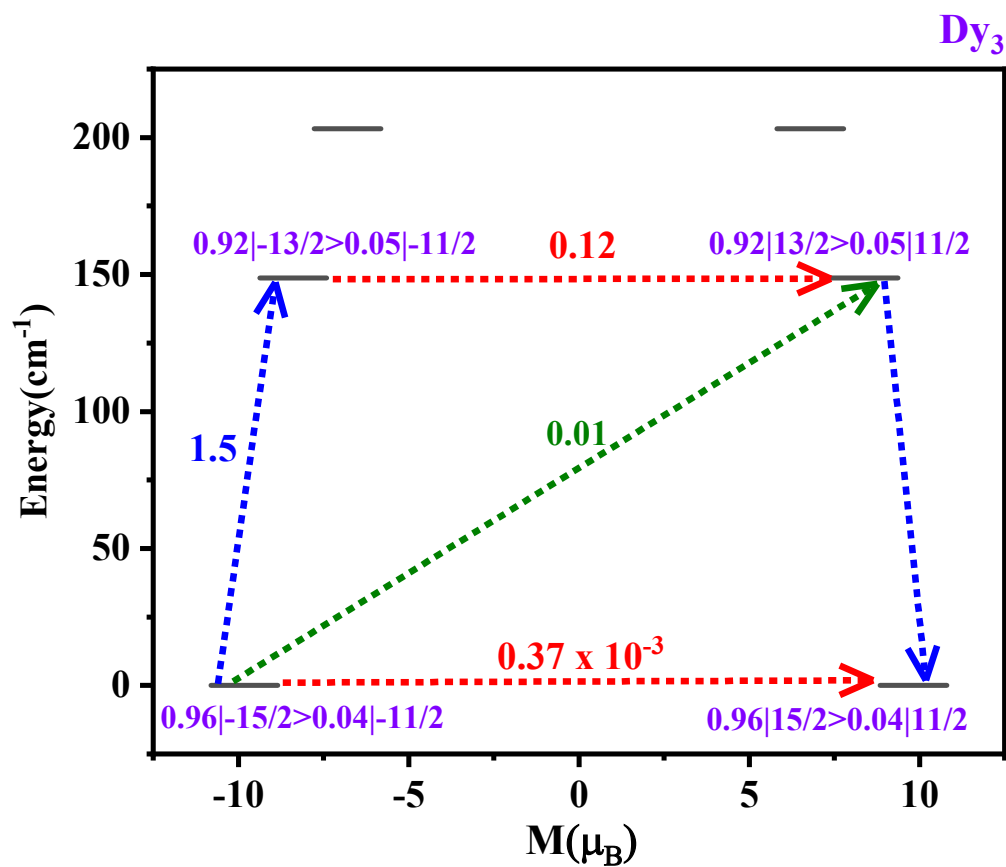

**Figure S4:** Magnetic relaxation mechanism of Dy<sub>2</sub> and Dy<sub>3</sub> centers in 4.

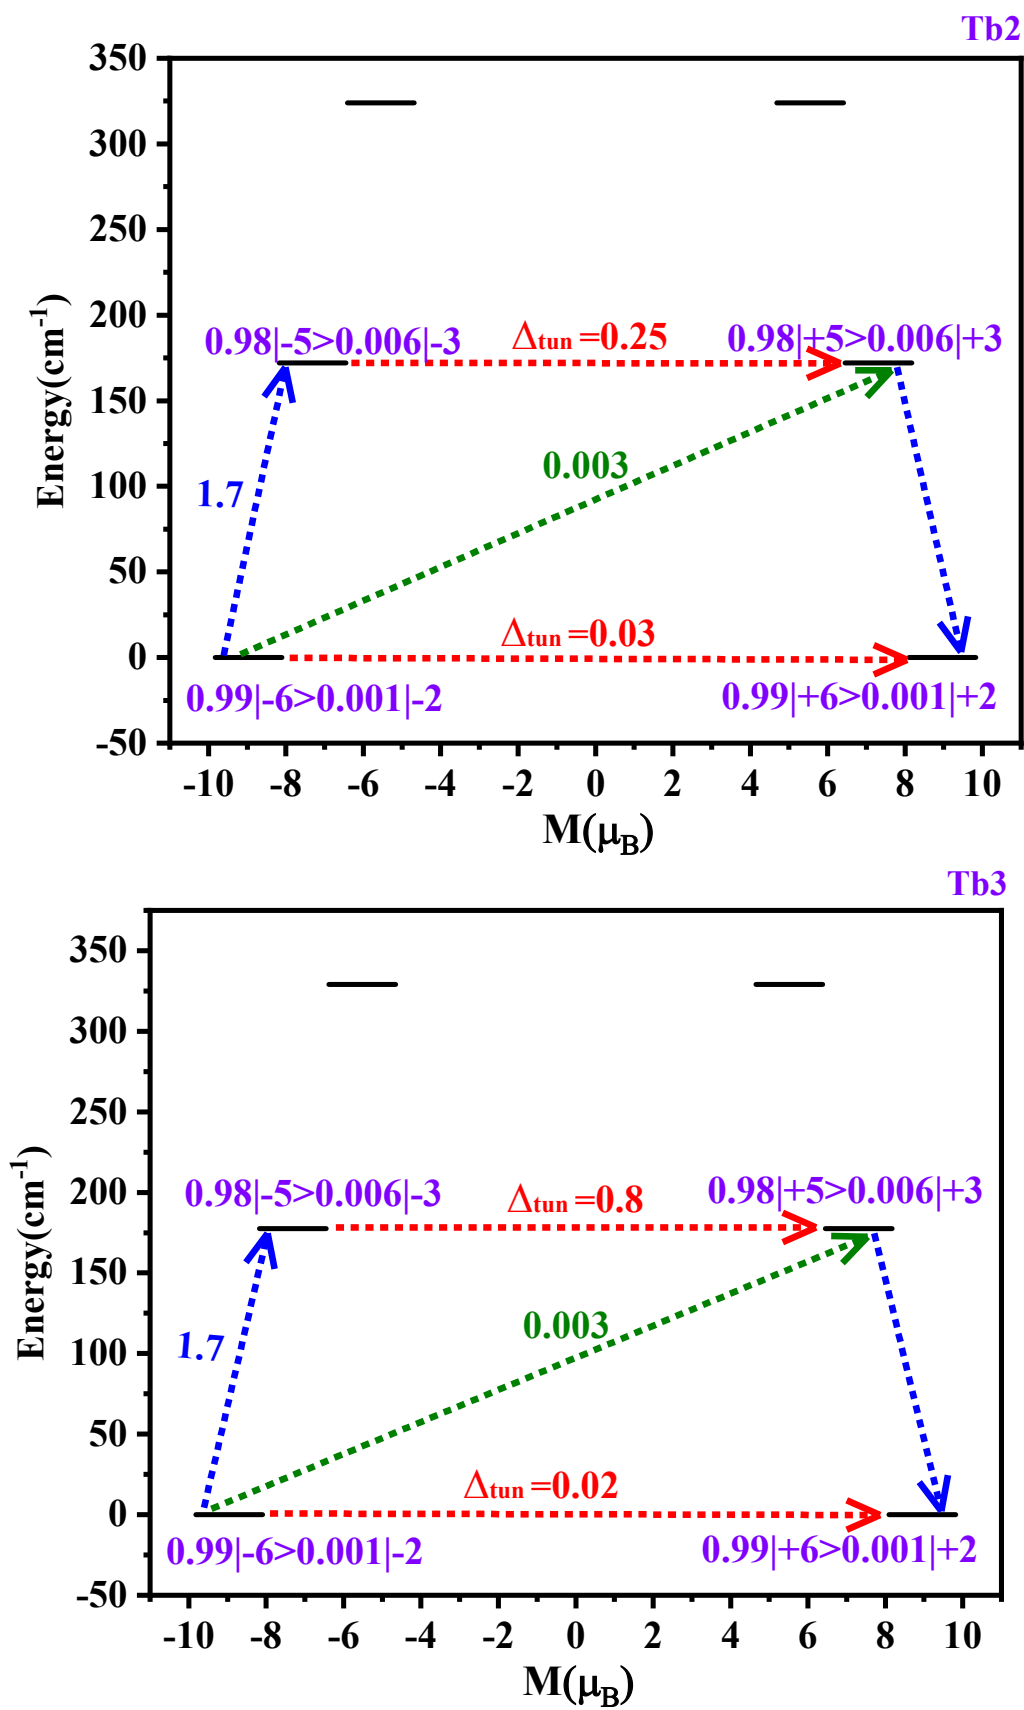

Figure S5: Magnetic relaxation mechanism of Tb2 and Tb3 centers in 5.

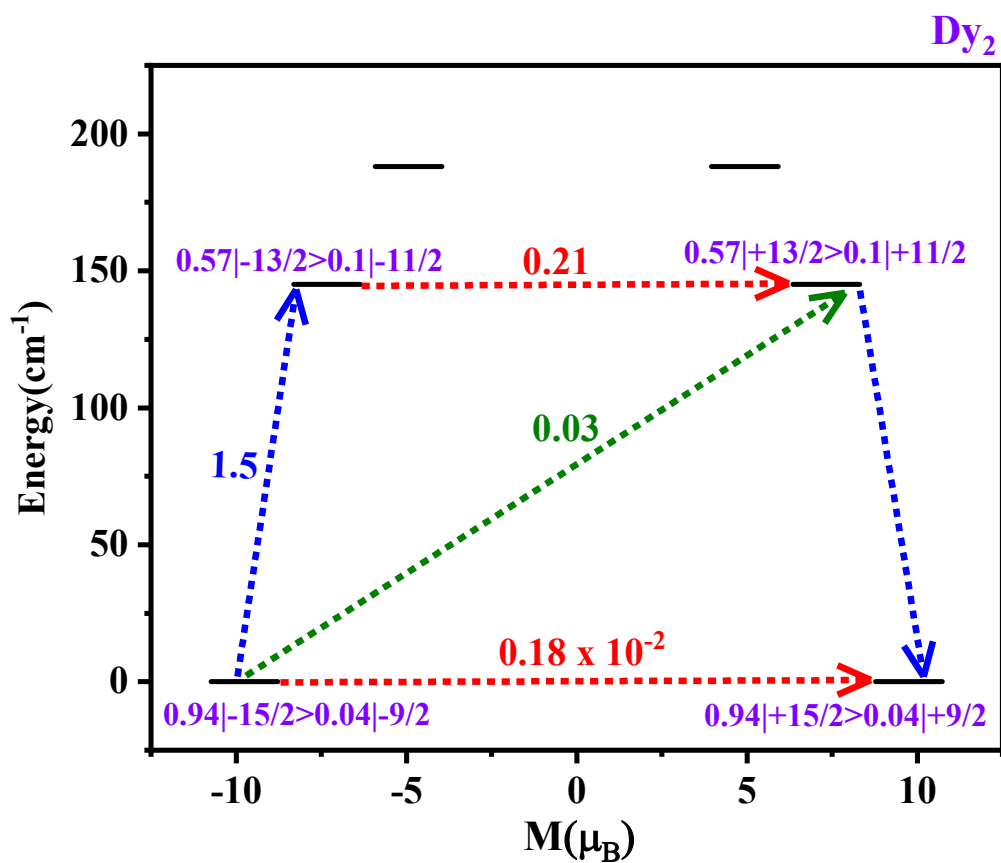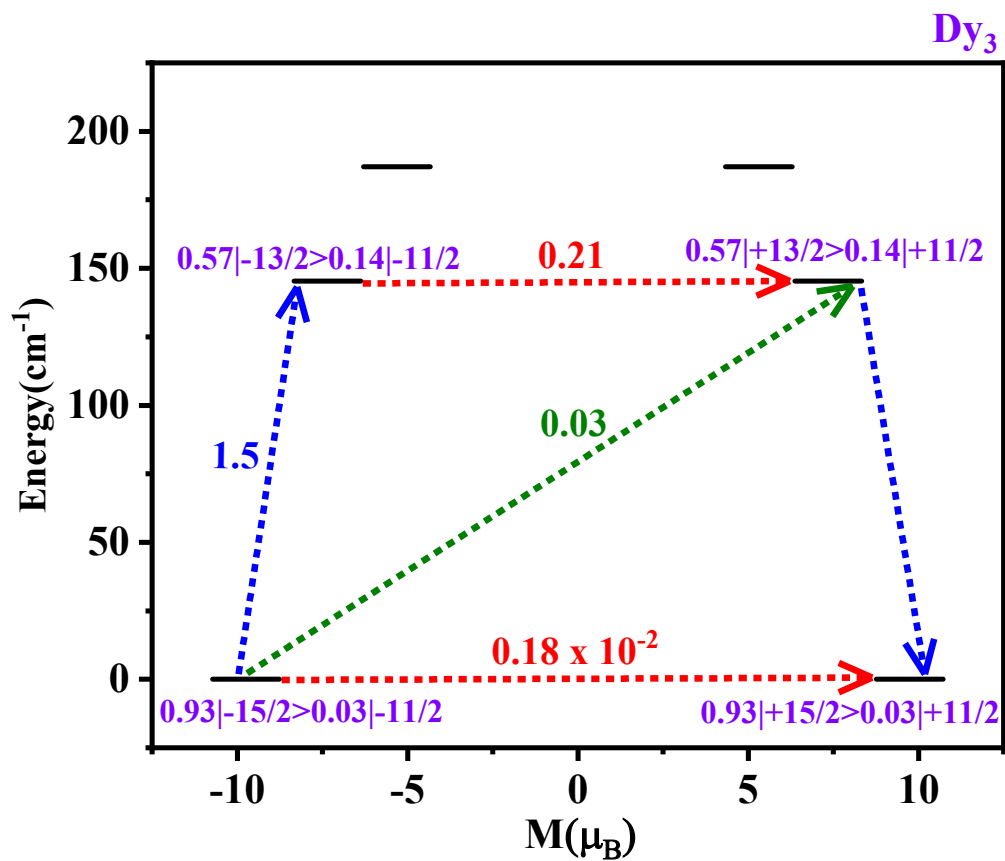

**Figure S6:** Magnetic relaxation mechanism of Dy<sub>2</sub> and Dy<sub>3</sub> centers in 7.

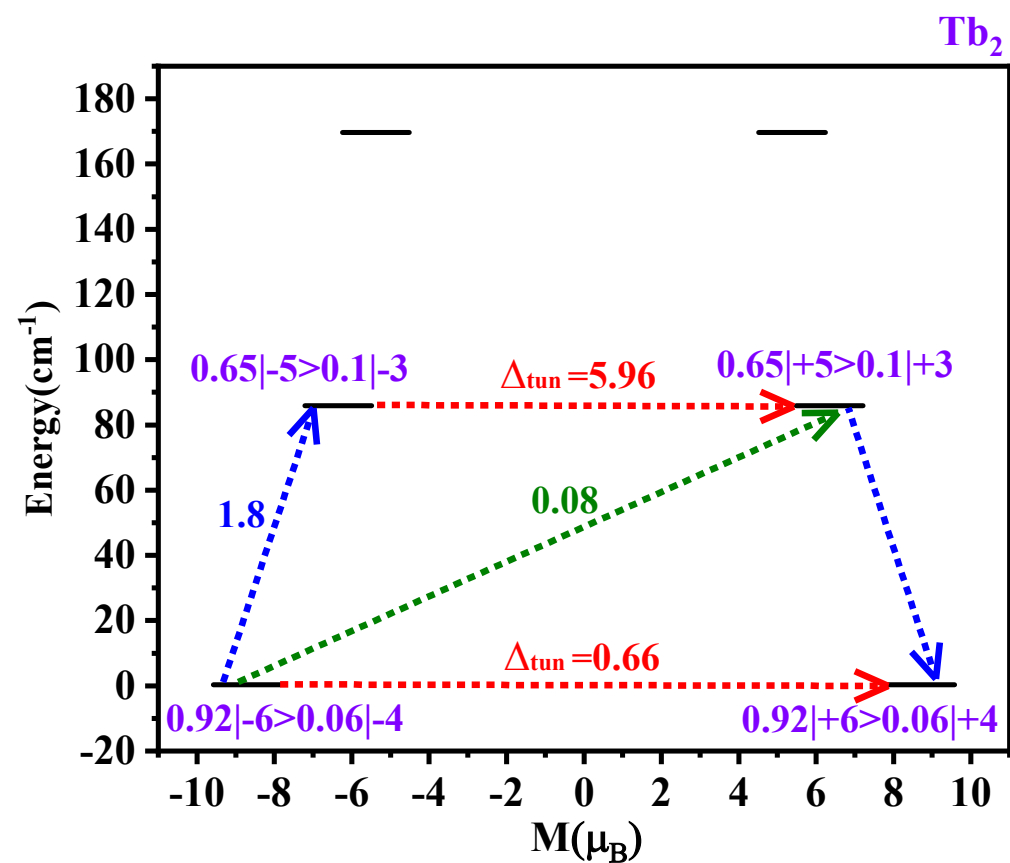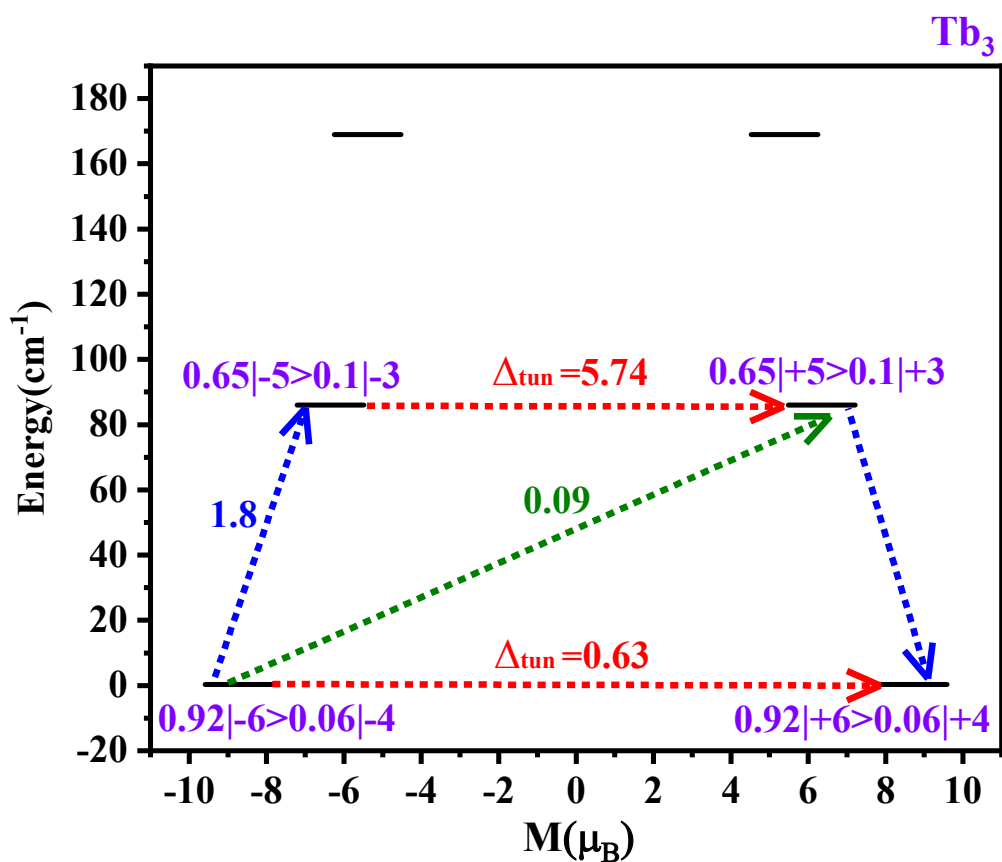

Figure S7: Magnetic relaxation mechanism of Tb<sub>2</sub> and Tb<sub>3</sub> centers in **8**.

**Table S10:** SINGLE\_ANISO computed crystal field parameters for each Dy(III) ion in complex  $\{Zn_3Dy_3\}$  (**1**). The major components in the Table are in bold.  $B_k^q$  is the crystal field parameter and  $Q_k^q$  is the extended Stevens operator. The quantization axis is chosen to be the main magnetic axis of the ground pseudo-doublet.

| k | q  | $B_k^q$                 | $B_k^q$                 | $B_k^q$                 |
|---|----|-------------------------|-------------------------|-------------------------|
|   |    | Dy1                     | Dy2                     | Dy3                     |
| 2 | -2 | 0.005                   | 0.207                   | 0.093                   |
|   | -1 | -0.367                  | 0.337                   | -0.338                  |
|   | 0  | -2.866                  | -2.88                   | -2.893                  |
|   | 1  | 0.078                   | 0.095                   | -0.062                  |
|   | 2  | -0.448                  | -0.432                  | -0.478                  |
|   | 4  | -0.001                  | 0.012                   | 0.011                   |
|   | -3 | -0.039                  | 0.034                   | -0.034                  |
|   | -2 | $-0.727 \times 10^{-3}$ | 0.004                   | 0.004                   |
|   | -1 | 0.008                   | -0.008                  | 0.008                   |
|   | 0  | 0.002                   | 0.002                   | 0.002                   |
|   | 1  | $0.939 \times 10^{-3}$  | -0.001                  | $0.976 \times 10^{-3}$  |
|   | 2  | -0.011                  | -0.01                   | -0.011                  |
|   | 3  | 0.002                   | 0.021                   | -0.018                  |
|   | 4  | -0.018                  | -0.013                  | -0.014                  |
|   | 6  | $-0.273 \times 10^{-4}$ | $0.173 \times 10^{-3}$  | $0.167 \times 10^{-3}$  |
|   | -5 | $-0.154 \times 10^{-4}$ | $0.311 \times 10^{-4}$  | $-0.288 \times 10^{-4}$ |
|   | -4 | $-0.111 \times 10^{-4}$ | $0.296 \times 10^{-4}$  | $0.231 \times 10^{-4}$  |
|   | -3 | $0.965 \times 10^{-4}$  | $-0.863 \times 10^{-4}$ | $0.785 \times 10^{-4}$  |
|   | -2 | $0.168 \times 10^{-4}$  | $-0.152 \times 10^{-3}$ | $-0.124 \times 10^{-3}$ |
|   | -1 | $-0.135 \times 10^{-3}$ | $0.134 \times 10^{-3}$  | $-0.14 \times 10^{-3}$  |
|   | 0  | $-0.244 \times 10^{-4}$ | $-0.239 \times 10^{-4}$ | $-0.244 \times 10^{-4}$ |
|   | 1  | $-0.234 \times 10^{-4}$ | $0.167 \times 10^{-4}$  | $-0.109 \times 10^{-4}$ |
|   | 2  | $0.389 \times 10^{-3}$  | $0.366 \times 10^{-3}$  | $0.362 \times 10^{-3}$  |
|   | 3  | $0.143 \times 10^{-4}$  | $-0.568 \times 10^{-4}$ | $0.483 \times 10^{-4}$  |
|   | 4  | $-0.277 \times 10^{-4}$ | $-0.130 \times 10^{-4}$ | $-0.174 \times 10^{-4}$ |
|   | 5  | $-0.481 \times 10^{-4}$ | $-0.233 \times 10^{-4}$ | $0.691 \times 10^{-4}$  |
|   | 6  | $-0.189 \times 10^{-3}$ | $-0.678 \times 10^{-4}$ | $-0.992 \times 10^{-4}$ |

**Table S11:** SINGLE\_ANISO computed crystal field parameters for each Dy(III) ion in complexes

{Cu<sub>3</sub>Dy<sub>3</sub>}(3). The major components in the Table are in bold.  $B_k^q$  is the crystal field parameter and

$Q_k^q$  is the Stevens operator. The axis is the main axis of the pseudo-

| k  | q                         | $B_k^q$<br>Dy1            | $B_k^q$<br>Dy2            | $B_k^q$<br>Dy3            |
|----|---------------------------|---------------------------|---------------------------|---------------------------|
| 2  | -2                        | 0.429                     | 0.351                     | -0.121                    |
|    | -1                        | -1.111                    | -0.987                    | -0.104                    |
|    | 0                         | -6.864                    | -6.92                     | -2.932                    |
| 4  | 1                         | -0.737x10 <sup>-3</sup>   | 0.631                     | 0.195                     |
|    | 2                         | 1.039                     | 0.978                     | 0.313                     |
|    | -4                        | -0.042                    | -0.103                    | 0.005                     |
|    | -3                        | -0.197                    | -0.153                    | -0.027                    |
| 6  | -2                        | -0.014                    | -0.035                    | 0.002                     |
|    | -1                        | 0.048                     | 0.049                     | 0.006                     |
|    | 0                         | 0.012                     | 0.012                     | 0.002                     |
|    | 1                         | -0.011                    | -0.002                    | 0.002                     |
|    | 2                         | -0.076                    | -0.071                    | -0.011                    |
|    | 3                         | 0.054                     | 0.141                     | -0.006                    |
|    | 4                         | -0.118                    | -0.069                    | -0.0192                   |
|    | -6                        | -0.002                    | -0.004                    | 0.866 x 10 <sup>-4</sup>  |
|    | -5                        | -0.001                    | 0.233 x 10 <sup>-4</sup>  | -0.215 x 10 <sup>-4</sup> |
|    | -4                        | -0.63 x 10 <sup>-3</sup>  | -0.644 x 10 <sup>-3</sup> | 0.128 x 10 <sup>-4</sup>  |
|    | -3                        | 0.001                     | 0.002                     | 0.527 x 10 <sup>-4</sup>  |
| -2 | 0.002                     | 0.004                     | -0.557 x 10 <sup>-4</sup> |                           |
| -1 | -0.003                    | -0.003                    | -0.146 x 10 <sup>-3</sup> |                           |
| 0  | -0.677 x 10 <sup>-3</sup> | -0.666 x 10 <sup>-3</sup> | -0.276 x 10 <sup>-4</sup> |                           |
| 1  | 0.414 x 10 <sup>-3</sup>  | 0.557 x 10 <sup>-3</sup>  | -0.392 x 10 <sup>-4</sup> |                           |
| 2  | 0.011                     | 0.009                     | 0.385 x 10 <sup>-3</sup>  |                           |
| 3  | -0.533 x 10 <sup>-3</sup> | -0.002                    | 0.436 x 10 <sup>-4</sup>  |                           |
| 4  | -0.832 x 10 <sup>-3</sup> | -0.852 x 10 <sup>-3</sup> | -0.155 x 10 <sup>-4</sup> |                           |
| 5  | -0.691 x 10 <sup>-4</sup> | 0.002                     | 0.523 x 10 <sup>-4</sup>  |                           |
| 6  | -0.004                    | -0.843 x 10 <sup>-3</sup> | -0.181 x 10 <sup>-3</sup> |                           |

extended operator. quantization chosen to be magnetic ground doublet.





**Table S12:** SINGLE\_ANISO computed crystal field parameters for each Dy(III) ion in complexes  $\{Ni_3Dy_3\}(5)$ . The major components in the Table are in bold.  $B_k^q$  is the crystal field parameter and  $Q_k^q$  is the extended Stevens operator. The quantization axis is chosen to be the main magnetic axis of the ground pseudo-doublet.

| k | q                         | $B_k^q$                   | $B_k^q$                   | $B_k^q$                   |
|---|---------------------------|---------------------------|---------------------------|---------------------------|
|   |                           | Dy1                       | Dy2                       | Dy3                       |
| 2 | -2                        | 1.642                     | -1.808                    | -1.73                     |
|   | -1                        | -1.938                    | -1.879                    | -1.789                    |
|   | 0                         | -1.891                    | -1.921                    | -1.906                    |
|   | 1                         | -0.978                    | 0.873                     | 0.791                     |
|   | 2                         | 1.142                     | 1.029                     | 0.981                     |
| 4 | -4                        | 0.319 x 10 <sup>-2</sup>  | 0.483 x 10 <sup>-3</sup>  | -0.395 x 10 <sup>-3</sup> |
|   | -3                        | -0.4 x 10 <sup>-2</sup>   | -0.515 x 10 <sup>-2</sup> | -0.182 x 10 <sup>-2</sup> |
|   | -2                        | -0.942 x 10 <sup>-2</sup> | 0.993 x 10 <sup>-2</sup>  | 0.972 x 10 <sup>-2</sup>  |
|   | -1                        | 0.857 x 10 <sup>-2</sup>  | 0.945 x 10 <sup>-2</sup>  | 0.822 x 10 <sup>-2</sup>  |
|   | 0                         | -0.201 x 10 <sup>-2</sup> | -0.209 x 10 <sup>-2</sup> | -0.194 x 10 <sup>-2</sup> |
|   | 1                         | 0.011                     | -0.011                    | -0.011                    |
|   | 2                         | -0.323 x 10 <sup>-2</sup> | -0.186 x 10 <sup>-2</sup> | -0.271 x 10 <sup>-2</sup> |
|   | 3                         | -0.109 x 10 <sup>-2</sup> | -0.528 x 10 <sup>-3</sup> | 0.155 x 10 <sup>-2</sup>  |
|   | 4                         | -0.015                    | -0.015                    | -0.015                    |
| 6 | -6                        | -0.239 x 10 <sup>-4</sup> | 0.51 x 10 <sup>-4</sup>   | 0.403 x 10 <sup>-4</sup>  |
|   | -5                        | 0.464 x 10 <sup>-3</sup>  | 0.384 x 10 <sup>-3</sup>  | 0.376 x 10 <sup>-3</sup>  |
|   | -4                        | 0.129 x 10 <sup>-3</sup>  | -0.107 x 10 <sup>-3</sup> | -0.105 x 10 <sup>-3</sup> |
|   | -3                        | 0.103 x 10 <sup>-3</sup>  | 0.468 x 10 <sup>-4</sup>  | 0.126 x 10 <sup>-4</sup>  |
|   | -2                        | 0.214 x 10 <sup>-3</sup>  | -0.197 x 10 <sup>-3</sup> | -0.181 x 10 <sup>-3</sup> |
|   | -1                        | 0.106 x 10 <sup>-3</sup>  | 0.861 x 10 <sup>-4</sup>  | 0.1 x 10 <sup>-3</sup>    |
|   | 0                         | -0.143 x 10 <sup>-4</sup> | -0.138 x 10 <sup>-4</sup> | -0.149 x 10 <sup>-4</sup> |
|   | 1                         | -0.651 x 10 <sup>-4</sup> | 0.777 x 10 <sup>-4</sup>  | 0.774 x 10 <sup>-4</sup>  |
|   | 2                         | -0.217 x 10 <sup>-3</sup> | -0.232 x 10 <sup>-3</sup> | -0.245 x 10 <sup>-3</sup> |
|   | 3                         | -0.356 x 10 <sup>-3</sup> | 0.362 x 10 <sup>-3</sup>  | 0.365 x 10 <sup>-3</sup>  |
|   | 4                         | -0.774 x 10 <sup>-4</sup> | -0.999 x 10 <sup>-4</sup> | -0.996 x 10 <sup>-4</sup> |
| 5 | -0.246 x 10 <sup>-3</sup> | 0.321 x 10 <sup>-3</sup>  | 0.353 x 10 <sup>-3</sup>  |                           |
| 6 | -0.453 x 10 <sup>-4</sup> | -0.369 x 10 <sup>-4</sup> | -0.377 x 10 <sup>-4</sup> |                           |

**Table S13:** Lowest exchange doublets ( $\text{cm}^{-1}$ ) corresponding to QTM/TAQT-M, and the  $g_z$  value of each doublet ( $g_x$  and  $g_y = 0$ ) for complex  $\{\text{Zn}_3\text{Dy}_3\}(1)$ .

| No. | E( $\text{cm}^{-1}$ )  | QTM/TA-QTM             | $g_z$        |
|-----|------------------------|------------------------|--------------|
| 1   | 0                      | $0.19 \times 10^{-8}$  | 39.547112309 |
| 2   | 0.30488<br>0.30488     | $0.26 \times 10^{-8}$  | 39.360131826 |
| 3   | 3.58402<br>3.58402     | $0.21 \times 10^{-10}$ | 39.553463369 |
| 4   | 4.23419<br>4.23419     | $0.18 \times 10^{-9}$  | 0.151399626  |
| 5   | 128.09638<br>128.09638 | $0.41 \times 10^{-5}$  | 36.495787817 |
| 6   | 128.29706<br>128.29706 | $0.28 \times 10^{-3}$  | 38.459259410 |
| 7   | 128.42693<br>128.42693 | $0.11 \times 10^{-3}$  | 37.921969120 |
| 8   | 128.76485<br>128.76485 | $0.25 \times 10^{-3}$  | 36.393454898 |
| 9   | 128.92082<br>128.92082 | $0.12 \times 10^{-3}$  | 37.216826185 |
| 10  | 129.14869<br>129.14869 | $0.14 \times 10^{-4}$  | 36.150019038 |
| 11  | 131.19299<br>131.19299 | $0.10 \times 10^{-5}$  | 37.063775026 |
| 12  | 131.67494<br>131.67494 | $0.97 \times 10^{-4}$  | 38.435960845 |
| 13  | 131.72672<br>131.72672 | $0.58 \times 10^{-3}$  | 3.500606505  |
| 14  | 132.14048<br>132.14048 | $0.95 \times 10^{-5}$  | 35.646659909 |
| 15  | 132.41837<br>132.41837 | $0.34 \times 10^{-4}$  | 3.191274357  |

**Table S14:** Lowest exchange doublets ( $\text{cm}^{-1}$ ) corresponding to tunnel Splitting ( $\Delta_{\text{tun}}$ ,  $\text{cm}^{-1}$ ), and the  $g_z$  value of each doublet ( $g_x$  and  $g_y = 0$ ) for complex  $\{\text{Cu}_3\text{Dy}_3\}$ (4).

| No. | 4.441100538866<br>0.000000000000<br>0.000000111608 | $0.4 \times 10^{-9}$ | 39.320637111 |
|-----|----------------------------------------------------|----------------------|--------------|
| 1   | 0.000000000000<br>0.000000111608                   | $1.1 \times 10^{-9}$ | 43.473095458 |
| 2   | 0.004753750736<br>0.004753902392                   | $1.5 \times 10^{-9}$ | 43.480099934 |
| 3   | 0.017871284790<br>0.017871324858                   | $0.4 \times 10^{-9}$ | 43.283661363 |
| 4   | 2.210967236501<br>2.210967362933                   | $1.2 \times 10^{-9}$ | 39.495483401 |
| 5   | 2.212571546887<br>2.212571633058                   | $0.8 \times 10^{-9}$ | 42.048574725 |
| 6   | 2.215428644228<br>2.215428808536                   | $1.6 \times 10^{-9}$ | 42.019559631 |
| 7   | 2.218466339200<br>2.218466598040                   | $2.5 \times 10^{-9}$ | 41.174763154 |
| 8   | 2.218909295197<br>2.218909427149                   | $1.3 \times 10^{-9}$ | 41.233870636 |
| 9   | 2.221915598849<br>2.221915926485                   | $3.2 \times 10^{-9}$ | 39.488266589 |
| 10  | 2.221915598849<br>2.221915926485                   | $3.2 \times 10^{-9}$ | 41.036895119 |
| 11  | 2.230161385630<br>2.230161423526                   | $0.3 \times 10^{-9}$ | 39.308175719 |
| 12  | 2.230719152089<br>2.230719197887                   | $0.4 \times 10^{-9}$ | 41.852863471 |
| 13  | 2.234775971324<br>2.234776040175                   | $0.6 \times 10^{-9}$ | 38.132163573 |
| 14  | 4.423539179599<br>4.423539275756                   | $0.9 \times 10^{-9}$ | 37.166921771 |
| 15  | 4.429433658412<br>4.429433957083                   | $2.9 \times 10^{-9}$ | 39.494027764 |
| 16  | 4.429583793421<br>4.429583932411                   | $1.3 \times 10^{-9}$ | 39.483031438 |
| 17  | 4.431038375939<br>4.431038558290                   | $1.8 \times 10^{-9}$ | 38.079952960 |
| 18  | 4.432591019086<br>4.432591382250                   | $3.6 \times 10^{-9}$ | 37.229587283 |
| 19  | 4.436070713907<br>4.436070974960                   | $2.6 \times 10^{-9}$ | 37.036549415 |

|    |                                      |                      |              |
|----|--------------------------------------|----------------------|--------------|
|    | 4.443009581705                       |                      |              |
| 21 | 4.447065706753<br>4.447065771312     | $0.6 \times 10^{-9}$ | 37.937626929 |
| 22 | 5.430173586395<br>5.430173588219     | $0.1 \times 10^{-9}$ | 0.132219462  |
| 23 | 6.642006259390<br>6.642006464158     | $2.0 \times 10^{-9}$ | 35.512563962 |
| 24 | 6.646745581225<br>6.646745858953     | $0.7 \times 10^{-9}$ | 35.520008254 |
| 25 | 6.659914120677<br>6.659914193684     | $0.7 \times 10^{-9}$ | 35.351609398 |
| 26 | 7.642175440123<br>7.642175441917     | $0.1 \times 10^{-8}$ | 4.096355223  |
| 27 | 7.644057548534<br>7.644057550301     | $0.1 \times 10^{-8}$ | 3.880648703  |
| 28 | 7.648390773569<br>7.648390775785     | $0.2 \times 10^{-8}$ | 4.032970660  |
| 29 | 9.856059119077<br>9.856059120815     | $0.1 \times 10^{-8}$ | 3.985641952  |
| 30 | 9.860392357454<br>9.860392359640     | $0.2 \times 10^{-8}$ | 4.103521396  |
| 31 | 9.862274462189<br>9.862274464347     | $0.2 \times 10^{-8}$ | 3.921000955  |
| 32 | 12.074275762886<br>12.074275765016   | $0.2 \times 10^{-8}$ | 0.107486358  |
| 33 | 127.964899602970<br>127.964973804412 | $0.7 \times 10^{-4}$ | 40.836010852 |

**Table S15:** Lowest exchange doublets ( $\text{cm}^{-1}$ ) corresponding to QTM/TAQT-M, and the  $g_z$  value of each doublet ( $g_x$  and  $g_y = 0$ ) for complex  $\{\text{Ni}_3\text{Dy}_3\}(7)$ .

| No. | E( $\text{cm}^{-1}$ ) | QTM/TA-QTM            | $g_z$   |
|-----|-----------------------|-----------------------|---------|
| 1   | 1E-7<br>1E-7          | $0.32 \times 10^{-6}$ | 30.3739 |
| 2   | 0.00671<br>0.00671    | $0.56 \times 10^{-6}$ | 30.2461 |
| 3   | 0.04196<br>0.04196    | $0.45 \times 10^{-7}$ | 29.8817 |
| 4   | 5.50119<br>5.50119    | $0.67 \times 10^{-9}$ | 4.4953  |
| 5   | 5.62264<br>5.62264    | $0.96 \times 10^{-6}$ | 31.8414 |
| 6   | 5.62853<br>5.62853    | $0.13 \times 10^{-4}$ | 34.8076 |
| 7   | 5.63112<br>5.63112    | $0.23 \times 10^{-4}$ | 31.7918 |
| 8   | 5.6342<br>5.6342      | $0.13 \times 10^{-5}$ | 33.5408 |
| 9   | 5.6467<br>5.6467      | $0.28 \times 10^{-5}$ | 33.7377 |
| 10  | 5.65263<br>5.65263    | $0.43 \times 10^{-5}$ | 34.6829 |
| 11  | 5.66884<br>5.66884    | $0.75 \times 10^{-6}$ | 34.3383 |
| 12  | 5.67116<br>5.67116    | $0.79 \times 10^{-6}$ | 33.1601 |
| 13  | 5.68388<br>5.68388    | $0.66 \times 10^{-6}$ | 31.2975 |
| 14  | 11.12447<br>11.12447  | $0.53 \times 10^{-6}$ | 5.9766  |
| 15  | 11.12632<br>11.12632  | $0.16 \times 10^{-6}$ | 5.6868  |
| 16  | 11.14393<br>11.14393  | $0.11 \times 10^{-7}$ | 5.7766  |
| 17  | 11.25118<br>11.25118  | $0.14 \times 10^{-4}$ | 36.3406 |
| 18  | 11.2586<br>11.2586    | $0.23 \times 10^{-4}$ | 34.6633 |
| 19  | 11.26933<br>11.26933  | $0.75 \times 10^{-5}$ | 34.801  |
| 20  | 11.27523<br>11.27523  | $0.18 \times 10^{-3}$ | 38.0386 |
| 21  | 11.27704<br>11.27704  | $0.29 \times 10^{-3}$ | 36.312  |

**Table S16:** Lowest exchange doublets ( $\text{cm}^{-1}$ ) corresponding to tunnel Splitting ( $\Delta_{\text{tun}}$ ,  $\text{cm}^{-1}$ ), and the  $g_z$  value of each doublet ( $g_x$  and  $g_y = 0$ ) for complex  $\{\text{Zn}_3\text{Tb}_3\}(\mathbf{2})$ .

| No. | E( $\text{cm}^{-1}$ )                | $\Delta_{\text{tun}}$ | $g_z$        |
|-----|--------------------------------------|-----------------------|--------------|
| 1   | 0.000000000000<br>0.002517970366     | $2.5 \times 10^{-3}$  | 30.081602288 |
| 2   | 0.010019007416<br>0.014246048909     | $4.2 \times 10^{-3}$  | 28.563295461 |
| 3   | 0.026956640611<br>0.028665551808     | $1.7 \times 10^{-3}$  | 31.910219291 |
| 4   | 3.675911896234<br>3.675912056562     | $1.6 \times 10^{-9}$  | 0.391974788  |
| 5   | 177.129845351287<br>177.129953525399 | $1.0 \times 10^{-4}$  | 30.942110347 |
| 6   | 177.649879801049<br>177.650006051460 | $1.3 \times 10^{-4}$  | 30.784587758 |
| 7   | 177.819749453082<br>177.819900371870 | $1.5 \times 10^{-4}$  | 30.934316908 |

**Table S17:** Lowest exchange doublets ( $\text{cm}^{-1}$ ) corresponding to QTM/TAQT-M, and the  $g_z$  value of each doublet ( $g_x$  and  $g_y = 0$ ) for complex  $\{\text{Cu}_3\text{Tb}_3\}$ (**5**).

| No. | E( $\text{cm}^{-1}$ )  | QTM/TA-QTM             | $g_z$   |
|-----|------------------------|------------------------|---------|
| 1   | 0<br>0.22684           | $0.94 \times 10^{-12}$ | 4.0276  |
| 2   | 0.22729<br>0.23057     | $0.76 \times 10^{-8}$  | 4.0484  |
| 3   | 0.45413<br>0.4574      | $0.62 \times 10^{-8}$  | 4.1863  |
| 4   | 0.45786<br>0.68469     | $0.99 \times 10^{-9}$  | 4.0158  |
| 5   | 10.20186<br>10.30177   | $0.27 \times 10^{-8}$  | 4.1388  |
| 6   | 10.4041<br>10.4269     | $0.37 \times 10^{-8}$  | 4.1878  |
| 7   | 10.42958<br>10.44382   | $0.37 \times 10^{-8}$  | 1.1201  |
| 8   | 10.52579<br>10.53336   | $0.65 \times 10^{-12}$ | 34.8255 |
| 9   | 10.53784<br>10.63202   | $0.91 \times 10^{-6}$  | 34.7169 |
| 10  | 10.63528<br>10.6378    | $0.64 \times 10^{-4}$  | 32.4112 |
| 11  | 10.6546<br>10.66923    | $0.72 \times 10^{-5}$  | 38.1122 |
| 12  | 10.67271<br>10.75728   | $0.19 \times 10^{-5}$  | 35.2263 |
| 13  | 10.76171<br>10.76939   | $0.43 \times 10^{-5}$  | 29.6446 |
| 14  | 10.86356<br>10.86546   | $0.63 \times 10^{-6}$  | 38.0225 |
| 15  | 10.86356<br>10.86546   | $0.77 \times 10^{-5}$  | 35.0931 |
| 16  | 10.87005<br>10.89823   | $0.15 \times 10^{-4}$  | 31.6503 |
| 17  | 10.99317<br>11.09825   | $0.27 \times 10^{-4}$  | 32.8392 |
| 18  | 172.92158<br>173.11264 | $0.16 \times 10^{-4}$  | 38.4995 |
| 19  | 173.14476<br>173.14857 | $0.17 \times 10^{-4}$  | 28.8671 |
| 20  | 173.3365<br>173.33962  | $0.59 \times 10^{-5}$  | 38.7488 |
| 21  | 173.37176<br>173.55349 | $0.47 \times 10^{-6}$  | 32.6328 |



**Table S18:** Lowest exchange doublets ( $\text{cm}^{-1}$ ) corresponding to tunnel Splitting ( $\Delta_{\text{tun}}$ ,  $\text{cm}^{-1}$ ), and the  $g_z$  value of each doublet ( $g_x$  and  $g_y = 0$ ) for complex  $\{\text{Ni}_3\text{Tb}_3\}$  (**8**).

| No. | E( $\text{cm}^{-1}$ )            | $\Delta_{\text{tun}}$ | $g_z$   |
|-----|----------------------------------|-----------------------|---------|
| 1   | 0.000000000000<br>0.216718263089 | 0.22                  | 17.7119 |
| 2   | 0.234133591441<br>0.436642499288 | 0.20                  | 0.27332 |

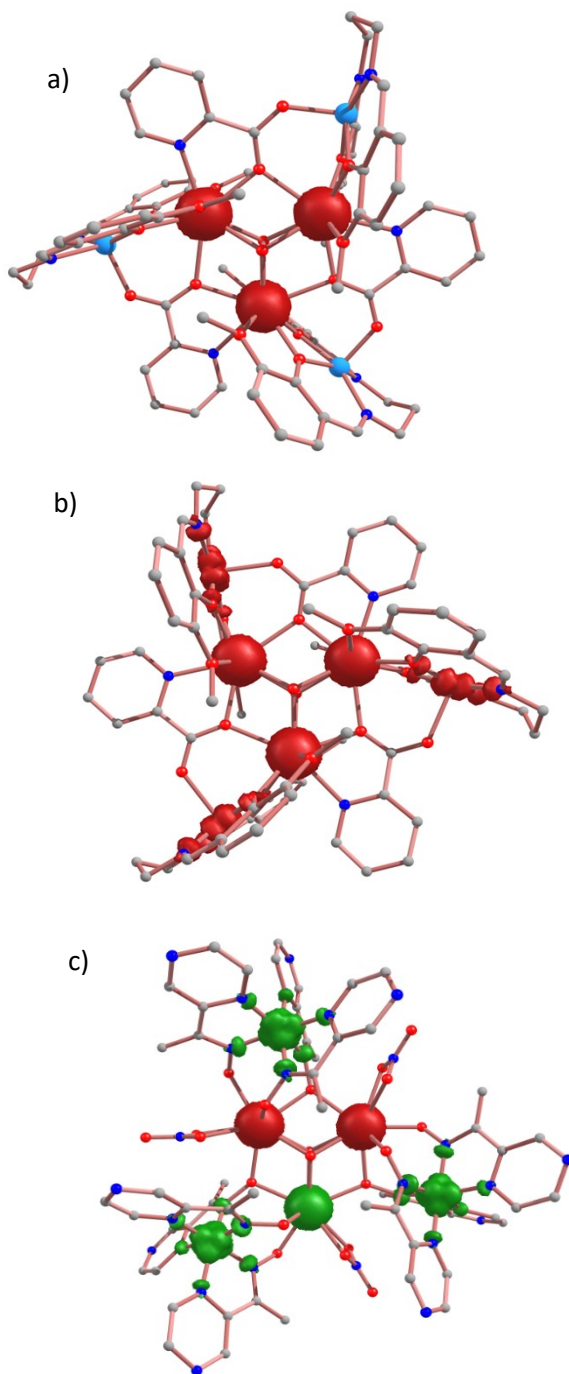

**Figure S8:** Spin density plot computed for complex a) **3**, b) **6**, and c) **9**. The red and green colors represent positive and negative spin densities, respectively.

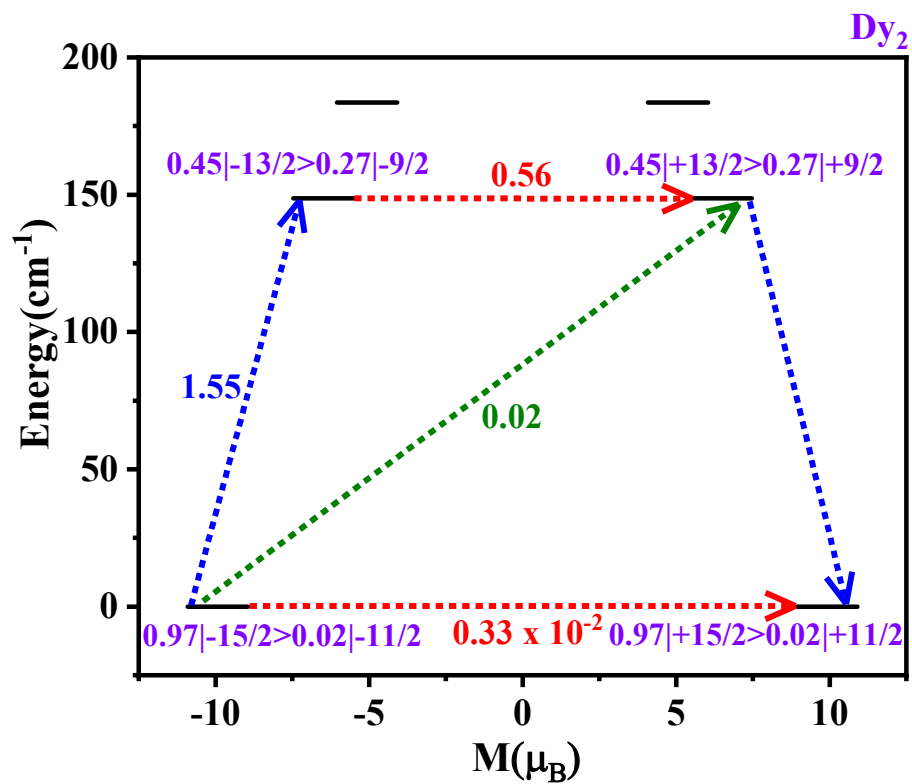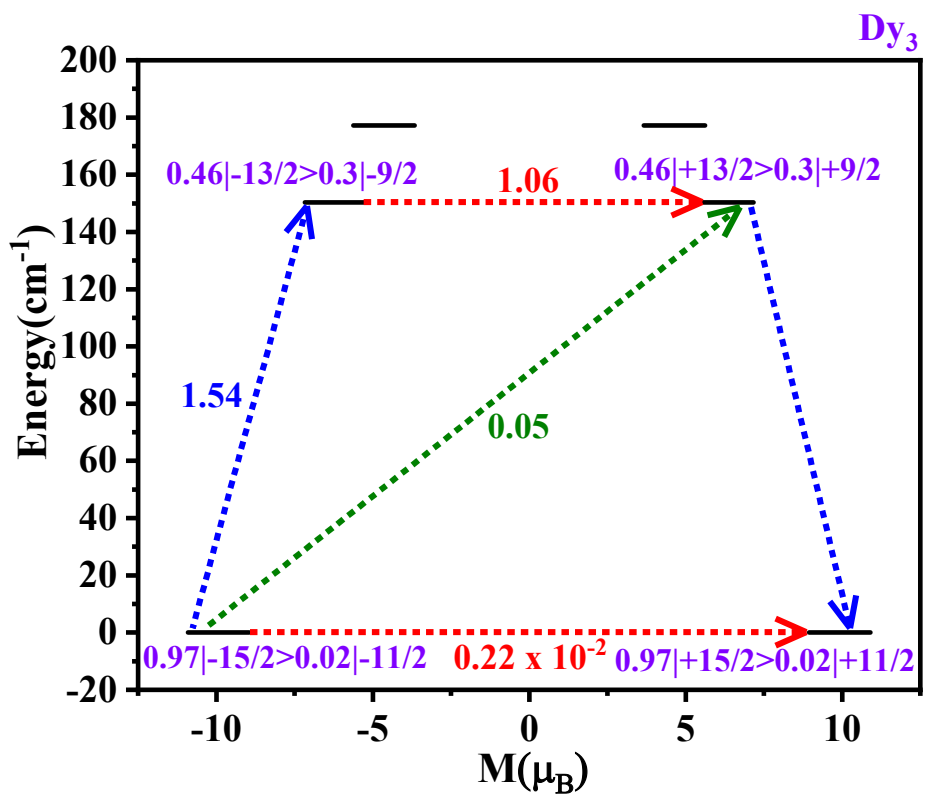

Figure S9: Magnetic relaxation mechanism of Dy<sub>2</sub> and Dy<sub>3</sub> centers in **1a**.

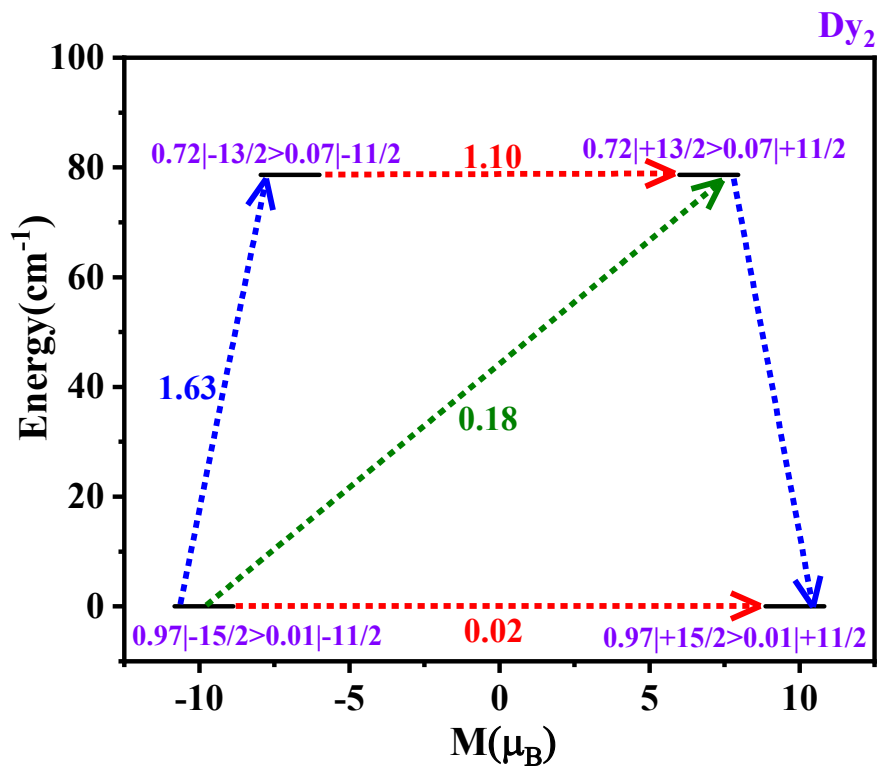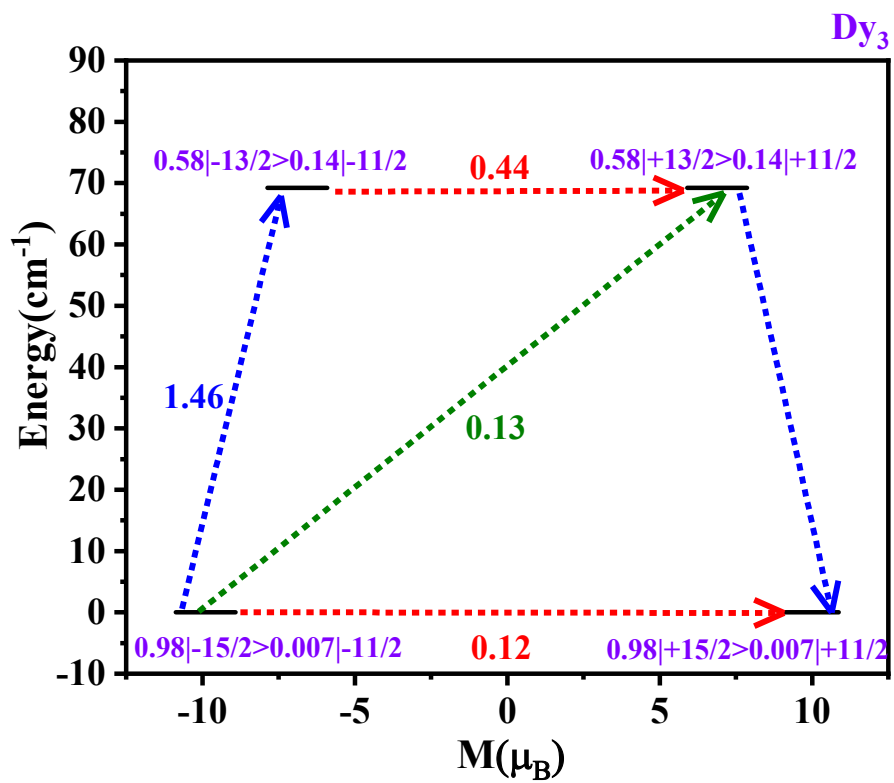

**Figure S10:** Magnetic relaxation mechanism of Dy<sub>2</sub> and Dy<sub>3</sub> centers in **10**.
